## The PKN1- TRAF1 signaling axis as a potential new target for chronic lymphocytic leukemia

Maria I. Edilova,<sup>1\*</sup> Jaclyn C. Law,<sup>1\*</sup> Safoura Zangiabadi<sup>2</sup>, Kenneth Ting<sup>1</sup>, Achire N. Mbanwi<sup>1</sup>, Andrea Arruda,<sup>3</sup> David Uehling,<sup>4</sup> Methvin Isaac,<sup>4</sup> Michael Prakesch,<sup>4</sup> Rima Al-awar,<sup>4,5</sup> Mark D. Minden,<sup>3</sup> Ali A. Abdul-Sater<sup>2\*\*</sup> and Tania H. Watts<sup>1\*\*</sup>

1. Department of Immunology, University of Toronto, Toronto, ON, Canada
2. School of Kinesiology and Health Science, Muscle Health Research Centre (MHRC), Faculty of Health, York University, Toronto, ON, Canada.
3. Princess Margaret Cancer Centre, University Health Network, Toronto, Ontario, Canada
4. Drug Discovery Program, Ontario Institute for Cancer Research, Toronto, ON, Canada
5. Department of Pharmacology and Toxicology, University of Toronto, Toronto, ON, Canada

*Running title: Targeting the PKN1-TRAF1 signaling axis in CLL*

*\*Co-first authors.*

*\*\*Co-senior authors.*

Corresponding author: Tania H. Watts, Department of Immunology, University of Toronto, Toronto, ON, Canada M5S 1A8; tel: 416-978-4551; [tania.watts@utoronto.ca](mailto:tania.watts@utoronto.ca)

## Abstract

TRAF1 is a pro-survival adaptor molecule in TNFR superfamily (TNFRSF) signaling. TRAF1 is overexpressed in many B cell cancers including refractory chronic lymphocytic leukemia (CLL). Little has been done to assess the role of TRAF1 in human cancer. Here we show that the protein kinase C related kinase Protein Kinase N1 (PKN1) is required to protect TRAF1 from cIAP-mediated degradation during constitutive CD40 signaling in lymphoma. We show that the active phospho-Thr774 form of PKN1 is constitutively expressed in CLL but minimally detected in unstimulated healthy donor B cells. Through a screen of 700 kinase inhibitors, we identified two inhibitors, OTSSP167 and XL-228, that inhibited PKN1 in the nanomolar range and induced dose-dependent loss of TRAF1 in RAJI cells. OTSSP167 and XL-228 treatment of primary patient CLL samples led to a reduction in TRAF1, pNF- $\kappa$ B p65, pS6, pERK, Mcl-1 and Bcl-2 proteins, and induction of activated caspase-3. OTSSP167 synergized with venetoclax in inducing CLL death, correlating with loss of TRAF1, Mcl-1 and Bcl-2. Although correlative, these findings suggest the PKN1-TRAF1 signaling axis as a potential new target for CLL. These findings also suggest OTSSP167 and venetoclax as a combination treatment for TRAF1 high CLL.

## Introduction

CLL is the most common human leukemia with an estimated 21,040 new cases and 4060 deaths in the US in 2020 (<https://seer.cancer.gov/statfacts/html/clyl.html>). CLL is considered to be largely a disease of the lymph node and bone marrow, where CLL cells receive survival signals through their B cell receptor (BCR).<sup>1,2</sup> Several promising new therapies for CLL target BCR signaling or cell survival, including the phosphatidylinositol-3-kinase inhibitor idelalisib, the Bruton's tyrosine kinase (BTK) inhibitor ibrutinib, as well as the Bcl-2 antagonist venetoclax.<sup>3-8</sup> While these treatments are showing great promise, responses are not always durable and when relapse occurs there are limited treatment options available.<sup>3,9,10</sup>

In addition to signaling through the BCR, B cells require signals through TNFRSF members such as CD40, which activates NF- $\kappa$ B to induce pro-survival Bcl-2 family members.<sup>11</sup> Many human malignancies including CLL, B cell lineage non-Hodgkins lymphoma and Burkitt's lymphomas, exhibit constitutive signaling via TNFRs, such as CD40, CD30 or the EBV protein LMP1.<sup>12-14</sup> TNFRSF members trigger NF- $\kappa$ B activation through recruitment of TRAF proteins.<sup>15</sup> TRAF1 is an NF- $\kappa$ B inducible protein<sup>16</sup> that on its own cannot induce NF- $\kappa$ B but as a 1:2 heterotrimer with TRAF2 recruits a single cellular inhibitor of apoptosis protein (cIAP)<sup>17</sup> to induce activation of the classical NF- $\kappa$ B signaling pathway downstream of several TNFRSF members, including CD40 on B cells.<sup>18</sup> cIAPs are dual function E3 ligases. cIAPs can add K63-linked polyubiquitin to RIP, thereby activating NF- $\kappa$ B signaling,<sup>19</sup> but can also add K48-linked ubiquitin to TRAF proteins, thereby inducing TRAF protein degradation.<sup>20</sup> Thus an outstanding question is how TRAF proteins can recruit cIAPs without being degraded. TRAF1 is overexpressed in 48% of B cell related cancers with the highest expression in the most refractory CLL.<sup>21</sup> Non-coding single nucleotide polymorphisms in *TRAF1* have been linked to non-Hodgkin's lymphoma;<sup>22</sup> however, TRAF1 dependent signaling has not been specifically targeted as a cancer therapy. While TRAF2, the binding partner for TRAF1 is ubiquitously expressed and mice deficient in TRAF2 die of lethal inflammation,<sup>23</sup> TRAF1 expression is largely limited to cells of the immune system<sup>24</sup> and mice lacking TRAF1 have no overt phenotype.<sup>25</sup> The finding that *Traf1* is required for lymphomagenesis in a spontaneous mouse tumor model induced by constitutively active NF- $\kappa$ B<sup>26</sup> makes TRAF1 a potential target in B cell malignancies; however, signaling adaptors are not readily amenable to drug discovery.

TRAF1 is a target of phosphorylation by the ubiquitously expressed protein kinase C related kinase PKN1 (also known as PRK1).<sup>27</sup> PKN1 phosphorylates TRAF1, but not other TRAF family members, at serine 146 in human or serine 139 in mouse.<sup>27</sup> Here we show that phosphorylation of TRAF1 S146 by PKN1 is required to protect TRAF1 from cIAP-mediated degradation during constitutive CD40 signaling in RAJI cells. We find that the activated phospho-Thr744 form of PKN1 is readily detected in patient CLL cells but minimally present in B cells from healthy donors. Accordingly, we screened a library of 700 kinase inhibitors and identified two PKN1 inhibitors, OTSSP167, a maternal embryonic leucine zipper kinase (MELK) inhibitor and XL-228, a multi-targeted tyrosine kinase inhibitor, that induced dose-dependent decreases in TRAF1, NF- $\kappa$ B p65, pERK, pS6, Mcl-1 and Bcl-2 proteins in primary patient CLL cells, with concomitant induction of cell death. We also report that OTSSP167 has synergistic effects with the Bcl-2 antagonist venetoclax in inducing cell death.

## Methods

**Human subjects.** Frozen peripheral blood mononuclear cells (PBMCs) from 25 CLL patients were obtained from the Leukemia Tissue Bank at Princess Margaret Cancer Centre/University Health Network (UHN), Toronto, Ontario (**Table S1**). Informed consent for tissue bank donation was in compliance with the Declaration of Helsinki and in agreement with the UHN Research Ethics Review Board (protocol 01-0573) and the research herein was also approved by the University of Toronto Research Ethics board (Protocol #: 00030910). Cytogenetic alterations in CLL samples were determined by fluorescent *in situ* hybridization. Researchers were blinded to the clinical status of the patient samples until study completion. CLL cells were identified as CD19<sup>+</sup>/CD5<sup>+</sup> cells by flow cytometry and generally accounted for >85% of PBMC. Blood from healthy donors was obtained with informed consent (University of Toronto REB protocol number 00027673) and samples stored as frozen PBMC until use. Healthy donor B cells were purified from PBMC using the EasySep Human B cell Isolation Kit (STEMCELL Technologies) according to the manufacturer's protocol.

**Cell lines.** RAJI and Daudi cell lines were from ATCC, 293 cells from in Invitrogen. For further details on cell culture and procedures see supplemental methods. The human embryonic kidney 293 cell line (293 FT) was obtained from Invitrogen (Invitrogen, Carlsbad, United States) and cultured in Dulbecco's modified Eagle's medium (Sigma-Aldrich, St. Louis, United States) supplemented with 10% Fetal Calf Serum (FCS, Thermo Fisher Scientific) and 1% of 100X Glutamine-Penicillin-Streptomycin (GPPS) (Sigma-Aldrich, Oakville, Canada). RAJI and Daudi were obtained from the ATCC and maintained in RPMI 1640 with FCS/GPPS. All cell lines tested negative for mycoplasma (Mycoplasma detection kit, Millipore-Sigma, Oakville, Ontario). OP9 cells were kindly provided by J.C. Zuniga-Pflucker, Sunnybrook research institute, Toronto, Canada and plated 10<sup>5</sup> cells/well of a 24-well plate in  $\alpha$ -MEM supplemented with 20% FCS and GPPS and used when confluent.

**Plasmid construction and transfection.** The human TRAF1 ORF was amplified from RAJI cells cDNA, cloned into pENTR-D-TOPO vector (Invitrogen) and the S146A mutation introduced into pENTR-D-TOPO using QuikChange II Site-Directed Mutagenesis Kit (Stratagene, San Diego, United States) following manufacturer's instructions. WT-TRAF1 and S146A-TRAF1 were cloned into a pcDNA3-c-Flag vector, a gift from Stephen Smale (Addgene plasmid # 20011). The Flag tag in WT-TRAF1 construct was replaced with a 3x-HA tag. WT and K644E human PKN1 ORFs were codon optimized for mammalian gene expression and synthesized by GeneArt Gene Synthesis (Invitrogen). WT and K644E PKN1 were the cloned into pCDNA3.1+ (Invitrogen). Cells were transfected with either 200ng of WT-TRAF1-HA, 200ng of S146A-TRAF1-FLAG, 50ng of WT PKN1, 50ng of K644E-PKN1 or 50ng of pCDNA 3.1+ empty vector with 1.5 $\mu$ l/well of Lipofectamine 2000 following manufacturer's instructions (Invitrogen). After 6h of incubation, the media was then replaced with fresh growth medium and cells were cultured overnight until cycloheximide treatment on the next day.

**shRNA knockdown.** 3x10<sup>6</sup> 293FT cells were transfected with 0.8 $\mu$ g of VSV-G, 5.4 $\mu$ g psPAX2, and 6 $\mu$ g of pLKO.1-shRNA plasmid (Openbiosystems, Chicago, United States) using lipofectamine 2000 (Invitrogen) according to the manufacturer's instructions. shRNA mature antisense sequences for TRAF1 and PKN1 are AACAAATGTTCTCAAACACACG and TATCCGCTTCTCACACATCAG, respectively. 60h after transfection, the supernatant of the cultures was collected, filtered through a low protein binding 0.22 $\mu$ M filter, and added to target cells for 24h before selection with 4 $\mu$ g/ml puromycin (Bio Basic, Markham, Canada). For TRAF1 knockdown in RAJI cells, cells were then seeded in 96 wells at 1 cell per well, allowing cells to grow into clones from a single cell. Several clones were then tested for reduction in TRAF1 levels by Western Blotting and Flow cytometry, and those with the lowest TRAF1 levels were chosen for downstream assays. For PKN1 knockdown in RAJI and 293T cells, sufficient reduction in PKN1 protein level was observed in the pool knockdown by Western blotting so no cloning was necessary.

**Cycloheximide Inhibition and Western blot.** Following overnight recovery from transfection, 293FT or RAJI cells were treated or not with cycloheximide (Sigma-Aldrich) at 3µg/ml as indicated in the figures. After treatment, the media was removed and cells were washed once with PBS (Sigma-Aldrich), then lysed for protein extraction. Where indicated, SMAC mimetic BV6 (Sigma-Aldrich, St. Louis, USA) was added at 5µM. Cells were lysed in 0.5% Nonidet P-40 (Millipore-Sigma, Oakville, Canada) with phosphatase and protease inhibitor mix (Roche, Basel, Switzerland). Total protein concentration was quantified by a colorimetric assay (Bio-Rad, Berkeley, United States), then subjected to SDS-PAGE (10% gel) and transferred to polyvinylidene difluoride membranes (semi-dry transfer; Bio-rad). After blocking, membranes were probed with antibodies specific for TRAF1 (clone 45D3, Cell Signaling, Danvers, United States), PKN1 (BD Biosciences, Franklin Lakes New Jersey, United States) and GAPDH (Thermo Fisher Scientific), followed by HRP-conjugated anti-rabbit or anti-mouse (Jackson Immunoresearch, Baltimore, United States), and signals were detected with a chemiluminescence substrate (GE Healthcare, Baie D'Urfe, Quebec, Canada) and visualized by autoradiography.

**Immunoprecipitation.** 6x10<sup>6</sup> RAJI cells in 10cm dishes were treated with Cycloheximide (see above) with or without BV6 and lysed in 800 µl 1% NP-40 buffer including protease and phosphatase inhibitor cocktails. 20 µl prewashed magnetic Protein G Dynabeads (ThermoFisher) were incubated with 0.5 µg antibody for CD40 (IP1; G28.5, purified from hybridoma cell line using Protein G sepharose, hybridoma was originally provided by Diane Hollenbaugh, then at Bristol-Myers Squibb; the antibody is now available at BioXCell) for 10min at room temperature, washed and then incubated with 100 µl of lysates overnight at 4 °C. Unbound proteins were saved for a subsequent immunoprecipitation (IP2) by incubating them with 20 µl prewashed magnetic Protein G Dynabeads (ThermoFisher) for 10min at room temperature and 0.5 µg antibody for TRAF1 (clone 1F342; Serviceeinheit Monoklonale Antikörper; Institut für Molekulare Immunologie, Munich, Germany). After three washes, immunoprecipitated proteins from IP1 and IP2 were fractionated on a 10% SDS-PAGE and immunoblotted for TRAF1 (clone 45D3; Cell Signaling).

**Kinase screen.** A screen of the 700 kinase Ontario Institute for Cancer Research (OICR) inhibitor library at 1µM concentration on PKN1 kinase activity *in vitro* was conducted by contract research organization Eurofins as described on their website ([www.eurofins.com](http://www.eurofins.com)). Briefly, PKN1 is incubated with 8 mM MOPS pH 7.0, 0.2 mM EDTA, 250 µM KKLNRTLSFAEPG, 10 mM magnesium acetate and gamma-<sup>33</sup>P-ATP. The reaction is initiated by the addition of the Mg/ATP mix. After incubation for 40 minutes at room temperature, the reaction is stopped by the addition of phosphoric acid to a concentration of 0.5%. 10 µl of the reaction is then spotted onto a P30 filtermat and washed four times for 4 minutes in 0.425% phosphoric acid and once in methanol prior to drying and scintillation counting. The kinase inhibitor library (**Table S2**) is an expanded version of one we have used previously<sup>28, 29</sup> and is comprised both of clinically investigated or marketed agents, as well as pre-clinical compounds identified from the patent and primary literature. Of the 700 kinases screened, 28 were selected for further dose titration (**Table S3**). Of the 28 screened *in vitro* by Eurofins, 9 were selected for further testing on RAJI cells (**Table S4**). Inhibitors were added in a final concentration of 0.1% DMSO in complete media and TRAF1 was measured by intracellular flow cytometry at 24hrs. Known targets of these drugs and IC<sub>50</sub> for inhibition of PKN1 kinase activity *in vitro* are included in **Table S3 and S4**.

**Treatment of RAJI cells with inhibitors and flow cytometry analysis.** shCTL, shTRAF1 and shPKN1 RAJI cell lines, were seeded at 2x10<sup>5</sup> cells per well in a 48-well plate in complete media (RPMI 1640 with added 10% Fetal Calf Serum (FCS), 2-ME, glutamine, penicillin, streptomycin and non-essential amino acids). Cells were harvested for flow cytometric analysis after 24h of treatment with 0.1% DMSO control, PF-941222<sup>30</sup>, UNC-2025 (Selleckchem, Houston, USA), crenolanib (Selleckchem), ipatasertib (Selleckchem), tofacitinib (Selleckchem), AT7867 (Selleckchem), uprosertib (Selleckchem), XL-228 (Chemietek, Indianapolis, USA), or OTSSP167 (Selleckchem), at various concentrations. All RAJI cells

were treated with inhibitors in a final concentration of 0.1% DMSO in complete media. For analysis by flow cytometry, Fc receptors were blocked with human Fc Block (eBioscience). For surface staining, cells were stained with eBioscience Fixable Viability Dye eFluor® 506 and then fixed for intracellular staining with Foxp3/Transcription Factor Staining Buffer Set (eBioscience). Purified TRAF1 antibody (clone 1F3, Serviceeinheit Monoklonale Antikörper; Institut für Molekulare Immunologie, Munich, Germany) was used prior to secondary staining with goat anti-rat PE (clone poly4054, Biolegend) for TRAF1.

**OP9 co-culture, CLL samples and treatment with inhibitors.** OP9 cells were re-suspended at  $10^5$  cells/mL in OP9 Media ( $\alpha$ -MEM with added 20% FCS, glutamine, penicillin and streptomycin) and seeded at  $5 \times 10^4$  cells per well into a 24-well plate. CLL patient samples were thawed and re-suspended at  $8 \times 10^6$  cells/mL in high glucose complete media (complete media with added 2.5g/L total glucose), plated at  $2 \times 10^6$  cells per well on a 24-well plate containing confluent OP9 and rested overnight. Samples were collected for flow cytometric analysis after 24h of treatment with 0.1% DMSO control or OTSSP167 or XL-228 or Venetoclax (EnzoLife Sciences, Farmingate, NY, ordered through Cedarlane, Ontario, Canada) at various concentrations. All CLL cells were treated with inhibitors in a final concentration of 0.1% DMSO in high glucose complete media.

#### **Flow cytometry analysis of patient samples.**

*Bcl-2 family members and TRAF1.* Anti-human Fc Block was used to block Fc receptors. For surface staining, live cells were stained with Fixable Viability Dye eFluor® 506. CLL cells were surface stained with anti-CD19 BV605 (clone HIB19) from Biolegend (San Diego, CA) and CD5 PE-Cy7 (clone UCHT2) purchased from eBioscience (La Jolla, CA). For intracellular staining, cells were fixed and permeabilized using Foxp3/Transcription Factor Staining Buffer Set (eBioscience). Purified TRAF1 antibody, anti-human Bcl-2 BV421 (clone 100, Biolegend) and anti-human Mcl-1 Alexa Fluor 647 (clone D2W9E, New England Biolabs) were used prior to secondary staining with goat anti-rat PE for TRAF1.

*Phosphomarkers.* For phosphoflow, live cells were stained with Fixable Viability Dye eFluor® 506 for 10min at 37°C prior to adding one volume of 2X Cytotfix/Perm/Wash Buffer (3% PFA + 2X BD Perm/Wash + ddH<sub>2</sub>O) directly to cell culture and incubated at room temperature for 15min and on ice for 1h. Cells were washed twice with Perm/Wash buffer (BD Biosciences) and re-suspended in Perm/Wash buffer with anti-human Fc blocking antibody. Cells were then stained with anti-CD19 BV605, anti-CD5 PE-Cy7, anti-human pNFκBp65-eFluor 660 (clone B33B4WP), anti-pS6 PE (clone cupk43k) and anti-pERK PerCP-eF710 (clone MILAN8R) from eBioscience for 1h at room temperature.

*Cleaved caspase-3 and TRAF1.* Anti-human Fc Block was used to block Fc receptors and then surface stained with Fixable Viability Dye eFluor® 506, anti-CD19 BV605 and anti-CD5 PE-Cy7. For intracellular staining, cells were fixed and permeabilized using the Foxp3/Transcription Factor Staining Buffer Set. Purified TRAF1 antibody and anti-cleaved caspase-3 Alexa Fluor 647 (clone D3E9, CST) were used prior to secondary staining with goat anti-rat PE (clone poly4054, Biolegend) for TRAF1. Gating on live cells was excluded when analysing cleaved caspase-3<sup>+</sup> cells.

Data were acquired on a BD LSRFortessa™ X-20 flow cytometer and analyzed using FlowJo v10.7.1 software. Protein expression by flow cytometry is quantified as the median fluorescence intensity (MFI) of the specific antibody stain minus the fluorescence minus one (FMO; background) control, which is referred to as “dMFI”. Statistics were calculated using Prism GraphPad v8 software. Researchers were blind to patient demographics and clinical data until experimental data acquisition and analysis was complete.

**Data availability statement:** Complete gels and raw flow cytometry FCS files associated with the figures are available from the authors upon request.

## 1 Results

2

### 3 *PKN1 is required for TRAF1 protein stability*

4

5 To determine the effect of PKN1 on TRAF1 biology, we knocked down PKN1 in lymphoma cell lines using  
6 lentiviral delivery of either a control small hairpin (sh) RNA (shCTL) or an shRNA targeting PKN1  
7 (shPKN1). Unexpectedly, knockdown of PKN1 led to a concomitant reduction in the level of TRAF1  
8 protein in RAJI and Daudi cells (**Figure 1A**). To test whether PKN1 affected protein stability, RAJI cells  
9 expressing control shRNA (shCTL) or shRNA targeting PKN1 (shPKN1) were incubated with  
10 cycloheximide at 37°C to block new protein synthesis and analyzed for levels of PKN1 and TRAF1 by  
11 western blotting. The results show that the absence of PKN1 is associated with decreased stability of  
12 TRAF1 protein (**Figure 1B**).

13

14 PKN1 was previously shown to phosphorylate TRAF1 on serine 146.<sup>27</sup> To determine if the phosphorylation  
15 of TRAF1 S146 by PKN1 is responsible for TRAF1 stability, we generated a mutant human TRAF1  
16 construct in which serine 146 was replaced with alanine (S146A). 293 cells were chosen for this experiment  
17 as they do not express TRAF1.<sup>31</sup> Upon transient transfection into 293T cells, TRAF1 S146A showed  
18 reduced stability compared to WT TRAF1 (**Figure 1C**). In contrast, when TRAF1 WT or S146A were  
19 expressed in 293T cells in which PKN1 had been knocked down by shRNA, both WT and TRAF1S146A  
20 showed a similar half-life, which was decreased compared to that of WT TRAF1 in PKN1 sufficient cells  
21 (**Figure 1D**).

22

23 To test whether the kinase activity of PKN1 was required for TRAF1 stability, we expressed TRAF1 as  
24 well as shRNA-resistant WT or kinase dead (K644E) PKN1<sup>32</sup> in 293T cells that had been stably transduced  
25 with shPKN1 (**Figure 1E**). In the absence of PKN1, TRAF1 protein showed a half-life of between 2 and  
26 4h. Overexpression of WT PKN1 in the PKN1 knockdown cells increased the TRAF1 protein half-life to  
27 at least 6h. In contrast, kinase dead PKN1 failed to increase TRAF1 stability. Although we observed higher  
28 expression of WT compared to kinase dead PKN1 in 293T cells, the level expressed was still in excess of  
29 the physiological level of PKN1 observed in cells before knockdown. Moreover, in another experiment,  
30 supraphysiological levels of kinase dead PKN1 also failed to increase TRAF1 stability (data not shown).  
31 Thus, reduced expression of PKN1 K644E is unlikely to account for its lack of efficacy in conferring  
32 TRAF1 protein stability. The finding that WT but not K644E PKN1 restores TRAF1 stability argues against  
33 off-target effects of PKN1 knockdown. Taken together, these results show that phosphorylation of TRAF1  
34 by PKN1 on S146 is required for TRAF1 protein stability in a B cell lymphoma.

35

36

### 37 *PKN1 protects TRAF1 from cIAP-mediated degradation in the CD40 signaling complex*

38

39 TRAF1 is important for the recruitment of cIAPs leading to NF-κB activation. However, cIAPs can add  
40 K48-linked ubiquitin to TRAF proteins, thereby inducing TRAF protein degradation.<sup>20</sup> Therefore, we  
41 hypothesized that PKN1 is required to protect TRAF1 from cIAP mediated degradation during CD40  
42 signaling. SMAC mimetics inhibit cIAP function by inducing their autoubiquitination and degradation.<sup>33</sup>  
43 To test the role of cIAPs in TRAF1 degradation, RAJI cells were treated with cycloheximide with or without  
44 the SMAC mimetic BV6 and then CD40 was immunoprecipitated from control RAJI cells or from RAJI  
45 cells knocked down for PKN1. A second immunoprecipitation of TRAF1 was used to analyze the effect of  
46 SMAC mimetics on the cytosolic, non-CD40 associated TRAF1 pool. In the presence of PKN1, CD40  
47 associated TRAF1 protein was decreased at 6h, but rescued by BV6 (**Figure 2A**). In the absence of PKN1,  
48 TRAF1 was less stable, already degrading by 3h, and again partially rescued by BV6 treatment. In contrast,  
49 the cytosolic pool of TRAF1 (IP2 in **Figure 2A**) was not sensitive to BV6 treatment. These results show  
50 that cIAPs contribute to degradation of TRAF1 in the CD40 signaling complex, and that PKN1 partially  
51 protects TRAF1 from cIAP-induced degradation.

52

53 *TRAF1 and PKN1 contribute to constitutive MAPK and mTOR signaling in RAJI cells*

54

55 We next asked whether PKN1 and TRAF1 contribute to constitutive signaling in RAJI cells. RAJI cells  
56 were deprived of serum and amino acids and then serum / amino acids were added back to synchronize  
57 constitutive signaling. Knockdown of TRAF1 reduced the level of pErk1/2 and pS6, a downstream target  
58 of mTOR (**Figure 2B**). Knockdown of PKN1 had an intermediate effect compared to direct TRAF1  
59 knockdown, correlating with its partial effect on TRAF1 levels (see **Figure 1A**). These findings suggested  
60 that inhibition of PKN1 could be used to reduce constitutive TRAF1-dependent survival signaling in B cell  
61 cancers.

62

63 *Identification of PKN1 inhibitors that reduce TRAF1 among the OICR library of 700 kinase inhibitors*

64

65 The above findings showed that PKN1 is important for TRAF1 protein stability. Therefore, it was of interest  
66 to identify a PKN1 inhibitor that could be used to test the importance of PKN1 in primary unmanipulated  
67 patient samples. To this end, we conducted a screen of the Ontario Institute for Cancer Research (OICR)  
68 kinase inhibitor library, which consists of 700 known kinase inhibitors. After an initial screen of inhibitors  
69 at 1 $\mu$ M (**Table S2**), 28 kinase inhibitors that substantially inhibited PKN1 were subjected to further dose-  
70 response analysis (**Table S3**). Of these compounds, we chose 9 that inhibited PKN1 *in vitro* in the 11-50nM  
71 range to test for effects on lowering TRAF1 in RAJI cells. The other known targets and IC<sub>50</sub> for PKN1  
72 inhibition for these compounds are listed in **Table S4**. The choice of compounds for testing on RAJI was  
73 made to avoid compounds for which known off target effects make them likely to decrease TRAF1 through  
74 inhibition of NF- $\kappa$ B. A further selection was made based on their inherent kinase selectivity or the  
75 uniqueness of the core scaffold for future drug development considerations. To validate the measurement  
76 of TRAF1 by flow cytometry, we used RAJI shCTL, shTRAF1 and shPKN1 cell lines (**Figure 3A**). Control  
77 RAJI cells showed a high level of TRAF1 by flow cytometry, shTRAF1 cells showed minimal TRAF1  
78 expression and shPKN1 RAJI cells showed an intermediate level of TRAF1, consistent with the Western  
79 blot data in Figure 1. Six of the nine compounds tested, PF-941222 (IC<sub>50</sub> for reducing TRAF1= 4.0 $\mu$ M),  
80 ipatasertib (IC<sub>50</sub>= 69 $\mu$ M), AT7867 (IC<sub>50</sub>= 1.4 $\mu$ M), uprosertib (IC<sub>50</sub>= 4.9 $\mu$ M), XL-228 (IC<sub>50</sub>= 2.3 $\mu$ M) and  
81 OTSSP167 (IC<sub>50</sub>= 18nM), induced dose-dependent decreases in TRAF1 protein after 24h of treatment of  
82 RAJI cells (**Figure 3B**). Two of the compounds, UNC-2025 and crenolanib increased rather than decreased  
83 TRAF1 levels, and tofacitinib, a JAK inhibitor previously shown to inhibit PKN1<sup>34</sup>, had minimal effects on  
84 TRAF1, potentially due to effects on other kinases. OTSST167, previously known as a MELK inhibitor,  
85 was the most potent of the compounds in causing dose-dependent loss of TRAF1. At the highest doses of  
86 OTSST167, when TRAF1 levels went below 10% of the original level, we saw induction of cell death in  
87 RAJI cells, as evidenced by activated caspase 3 (**Figure 3C**), albeit about half the cells were resistant to  
88 cell death. We next chose OTSST167, as well as a second PKN1 inhibitor that lowered TRAF1, XL-228,  
89 for effects on constitutive signaling in RAJI cells (**Figure 3D**). The loss of TRAF1 in RAJI cells induced  
90 by the two inhibitors was associated with dose-dependent loss of pS6 and pNF- $\kappa$ B p65. pERK levels were  
91 decreased only at the highest levels of OTSSP167 but not by XL-228. Taken together these data show that  
92 inhibitors selected for their ability to inhibit PKN1 and reduce TRAF1 in RAJI cells also reduced  
93 constitutive signaling in RAJI, with similar effects as knockdown of PKN1 or TRAF1.

94

95 *PKN1 is constitutively phosphorylated on Thr744 in primary CLL cells*

96

97 To examine PKN1 expression in primary CLL, we obtained frozen PBMC from CLL patients from the  
98 Leukemia Tissue Bank of Princess Margaret Hospital /UHN (**Table S1**). For 8/8 patient CLL samples  
99 examined, there was constitutive, relatively uniform expression of PKN1 (**Figure S1A and S1B**). PKN1  
100 can be activated by phosphorylation of its activation loop by the kinase PDK1.<sup>35,36</sup> Of interest, this activated  
101 pThr774 form of PKN1 was detected in all 8 CLL patient samples examined (**Figure S1A and S1B**),  
102 whereas there was lower expression of pThr774 PKN1 in purified B cells from healthy donors (**Figure**



103 **S1B**). Phospho-Thr 774 is also observed in RAJI cells (data not shown). All CLL samples examined also  
104 express TRAF1 protein as well as Zap70, albeit with some variation between samples. These data suggest  
105 that at least a fraction of PKN1 is found in its active, phospho-Thr744 state in CLL cells with minimal  
106 pThr744 PKN1 detected in healthy donor B cells, consistent with a possible role for PKN1 in contributing  
107 to TRAF1 overexpression in CLL.

108  
109 *OTSSP167 and XL-228 reduce TRAF1 and increase cell death in most primary CLL samples tested*  
110

111 Elevated expression of TRAF1 in hematopoietic malignancies,<sup>21</sup> combined with evidence in the literature  
112 that TRAF1 protects lymphocytes from apoptosis and contributes to lymphomagenesis in mice,<sup>26, 37-39</sup>  
113 suggests that TRAF1 may contribute to apoptosis-resistance in CLL. However, our attempts to knockdown  
114 TRAF1 in primary CLL with the shRNA- lentiviral construct used to knockdown TRAF1 in RAJI cells was  
115 unsuccessful, as no viable cells were recovered with lowered TRAF1, potentially due to the importance of  
116 TRAF1 in CLL survival. Therefore, we chose 3 PKN1 inhibitors, OTSSP167, XL-228 and AT7867,  
117 identified on the basis of their effect on PKN1 in vitro, and their ability to decrease TRAF1 in RAJI cells  
118 for their effects on primary CLL patient cells. We monitored intracellular TRAF1 by flow cytometry 24h  
119 after treatment and activated caspase-3, as an indicator of apoptotic cell death. CLL cells in the PBMC  
120 cultures were identified by co-expression of CD5 and CD19 (**Figure 4A**). TRAF1 expression was  
121 determined by gating on live CD5<sup>+</sup>CD19<sup>+</sup> CLL cells, while frequency of apoptotic cells was determined by  
122 the gating on cleaved caspase-3<sup>+</sup> cells from CD5<sup>+</sup>CD19<sup>+</sup> single cells without the live gate. OTSSP167 and  
123 XL-228 each induced dose-dependent decreases in intracellular TRAF1 protein and increases in activated,  
124 cleaved caspase-3 for 16/19 and 9/10 CLL patient samples analyzed, respectively (**Figure 4B-C and data**  
125 **not shown**). Moreover, the IC<sub>50</sub> for decreasing TRAF1 protein levels was similar to the IC<sub>50</sub> for activating  
126 caspase-3 for both OTSSP167 (30.7nM and 33.9nM, respectively) and XL-228 (2.96μM and 2.54μM,  
127 respectively) (**Figure 4B-C**), consistent with the linkage of the two effects. Two outliers (**Figure S2**) had  
128 low TRAF1 to start with and showed a slight increase in TRAF1 with treatment. A third outlier gave  
129 equivocal results, with decreases in TRAF1 only at high doses of OTSSP167 (**Figure S2**). Treatment with  
130 the lower affinity inhibitor AT7867 had no effect on TRAF1 expression or cell death in any of the samples  
131 (**Figure S3A**). Analysis of CLL cells at suboptimal concentrations of OTSSP167 (50nM) and XL-228  
132 (4μM), where approximately 20-50% of cells survived treatment, showed a clear dichotomy of cells into a  
133 TRAF1<sup>lo</sup> and TRAF1<sup>hi</sup> subset. Consistent with a role for TRAF1 in CLL survival, activated caspase-3 was  
134 limited to the TRAF1<sup>lo</sup> subset of cells within each donor (**Figure 4 D-E**). Together, these results show that  
135 for the majority of primary patient CLL samples tested, treatment with OTSSP167 and XL-228 leads to a  
136 reduction in TRAF1 protein in CLL cells. The loss of TRAF1 was not secondary to cell death, as TRAF1  
137 was measured in the live cell fraction only. Thus, loss of TRAF1 correlates with increased CLL death.

138  
139 *OTSSP167 and XL-228 decrease the expression of survival molecules in primary CLL cells.*  
140

141 TNFR family members can upregulate pro-survival Bcl-2 family members via NF-κB signaling.<sup>40</sup>  
142 Consistently, 24h after the addition of OTSSP167 and XL-228, Bcl-2 and Mcl-1 protein levels were reduced  
143 in CLL cells in a dose-dependent manner (**Figure 5A-B**). Furthermore, the IC<sub>50s</sub> for lowering Bcl-2 and  
144 Mcl-1 by OTSSP167 (49.8nM and 25.7nM, respectively) and XL-228 (3.52μM and 2.54μM, respectively)  
145 were similar to the IC<sub>50s</sub> for decreasing TRAF1 and increasing caspase-3 activation (**Figure 4B-C and**  
146 **Figure 5A-B**). We also examined Bcl-X<sub>L</sub>, but the flow cytometry signal in untreated samples was marginal  
147 and therefore not analyzed further (data not shown). AT7867, which did not affect TRAF1 and cell death  
148 in CLL cells also did not affect Bcl-2 and Mcl-1 expression (**Figure S3B**). These results show that the  
149 kinase inhibitors OTSSP167 and XL-228 reduce the level of TRAF1 protein in primary CLL cells and this  
150 decrease is associated with concomitant reductions of Bcl-2 and Mcl-1.

151  
152 *OTSSP167 and XL-228 decrease signaling intermediates in primary CLL cells.*  
153

154 TRAF1 enhances NF- $\kappa$ B, MAPK and pS6 activation downstream of TNFRs such as CD40, CD30, TNFR2,  
155 4-1BB and the EBV encoded TNFR LMP1.<sup>16, 39, 41-46</sup> Therefore, we asked how reduction of TRAF1  
156 impacted these downstream signaling pathways in live, primary CLL cells. After treatment of CLL cells  
157 with OTSSP167 for 24h, we observed a dose-dependent decrease in pNF- $\kappa$ B p65 ( $IC_{50}$  = 0.32 $\mu$ M), pS6  
158 ( $IC_{50}$  = 0.31 $\mu$ M) and pERK ( $IC_{50}$  = 1.04 $\mu$ M) (**Figure 6A**). Likewise, treatment of CLL cells with XL-228  
159 resulted in a dose-dependent decrease in pNF- $\kappa$ B ( $IC_{50}$  = 2.47 $\mu$ M), pS6 ( $IC_{50}$  = 1.44 $\mu$ M) and pERK ( $IC_{50}$  =  
160 2.23 $\mu$ M) (**Figure 6B**). In contrast, treatment of cells with AT7867 did not affect levels of pNF- $\kappa$ B, but  
161 slightly reduced pS6 and pERK (**Figure S3C**). As AT7867 had no effect on decreasing TRAF1 in primary  
162 CLL cells, the lack of effect on pNF- $\kappa$ B p65 is expected. As summarized in Table S4, AT7867 also inhibits  
163 AKT1,2 and 3 as well as S6K, possibly explaining the effects on pS6. These results show that the decreases  
164 in TRAF1 observed in primary CLL cells after treatment with PKN1 inhibitors are associated with a  
165 reduction in levels of pNF- $\kappa$ B p65, pS6 and pERK and largely recapitulate the results seen in RAJI cells.

166  
167 *PKN1 inhibition in combination with venetoclax results in increased CLL death correlating with reduced*  
168 *levels of TRAF1 and Bcl-2 family proteins*

169  
170 Venetoclax, a BH3 mimetic that antagonizes Bcl-2 and induces apoptosis is approved for the treatment of  
171 patients with relapsed and 17p deleted CLL.<sup>7, 47</sup> Although showing great promise, mechanisms of  
172 venetoclax resistance are emerging.<sup>48, 49</sup> The finding that inhibitors that targeted TRAF1 also reduced Bcl-  
173 2 and Mcl-1 levels in CLL cells suggested these inhibitors might be complementary to venetoclax.  
174 Therefore, we examined effects of the stronger of the two inhibitors, OTSSP167, in combination with  
175 venetoclax. Fewer than 15% of primary CLL cells died when treated with suboptimal OTSSP167 (10nM)  
176 or venetoclax (1nM) alone (**Figure 7A**). However, when cells were treated with increasing concentrations  
177 of venetoclax in combination with suboptimal (10nM) OTSSP167, the  $IC_{50}$  for cell death (1.71nM) was  
178 decreased 5.8-fold compared to venetoclax treatment alone (9.91nM) (**Figure 7B**). However, when cells  
179 were treated with increasing amounts of OTSSP167 in combination with suboptimal (1nM) venetoclax, the  
180  $IC_{50}$  for cell death was only reduced 1.9-fold to 23.7nM from 45.9nM with OTSSP167 treatment alone  
181 (**Figure 7C**). At the dose of venetoclax that resulted in approximately 50% death, we also observed that  
182 CLL cells from 4 of 6 patients were enriched for TRAF1<sup>hi</sup> cells after venetoclax treatment. The addition of  
183 suboptimal OTSSP167 in combination with this dose of venetoclax eliminated this TRAF1<sup>hi</sup> subset (**Figure**  
184 **7D**). Further analyses of the TRAF1<sup>hi</sup> and TRAF1<sup>lo</sup> subsets showed that TRAF1<sup>hi</sup> cells have higher  
185 expression of Bcl-2 family members Mcl-1 and Bcl-2 than TRAF1<sup>lo</sup> cells (**Figure 7E**). Given the lack of  
186 effect of venetoclax in lowering TRAF1, this may explain the reduced effects on cell death when suboptimal  
187 venetoclax is added to OTSSP167 as OTSSP167 alone effectively eliminates both TRAF1<sup>lo</sup> and TRAF1<sup>hi</sup>  
188 populations (**Figure 7 C, F**). Taken together, these data show that by targeting TRAF1, the inhibitor  
189 OTSSP167 has complementary effects with venetoclax on CLL cells by eliminating TRAF1<sup>hi</sup>, Bcl-2 and  
190 Mcl-1 co-expressing venetoclax-resistant cells (**Figure 7G**). Moreover, measurement of TRAF1 provides  
191 a useful marker of the effectiveness of OTSSP167 in inducing death CLL cells.

## 192 193 **Discussion**

194  
195 PKN1, a ubiquitous kinase, has been implicated as an effector of Rho GTPases<sup>50, 51</sup> and in regulation of  
196 cell migration.<sup>52-55</sup> Here, we reveal another role for PKN1 in maintaining the stability of TRAF1 protein in  
197 lymphoma and CLL cells. Knockdown and restoration experiments in RAJI and 293 cells confirmed the  
198 need for PKN1 phosphorylation of TRAF1 S146 to prevent TRAF1 degradation during constitutive CD40  
199 signaling in RAJI cells. During TNFR family signaling, TRAF1 is important in the recruitment of cIAPs  
200 for downstream NF- $\kappa$ B and MAPK signaling.<sup>39</sup> As cIAPs can add K48-linked polyubiquitin to trigger  
201 protein degradation as well as K63-linked polyubiquitin to scaffold downstream signaling, we hypothesized  
202 that phosphorylation of TRAF1 by PKN1 is required to protect it from cIAP-induced degradation during  
203 constitutive TNFR family signaling in B cell related cancer cells. The finding that SMAC mimetics that  
204 induce degradation of cIAPs abrogated TRAF1 degradation in the CD40 signalosome with little impact on

205 the cytosolic TRAF1 pool supports this hypothesis. PKN1 is regulated by phosphorylation on its activation  
206 loop by PDK1.<sup>35,36</sup> This active pThr774 form of PKN1 was readily detected by western blot in CLL patient  
207 samples, whereas substantially lower levels were detected in normal B cells from healthy donors. As PDK1  
208 can be activated downstream of BCR signaling, the activation of PKN1 may be explained by constitutive  
209 BCR signaling in CLL cells.<sup>56</sup> Thus, the presence of TRAF1 and the pThr744 form of PKN1 might be a  
210 useful adjunct in CLL screening. Interestingly, PDK1 and active PKN1 have also been noted in other  
211 cancers, with particularly high expression in ovarian serous carcinoma, suggesting that inhibition of PKN1  
212 might have broader use.<sup>57</sup>

213  
214 TRAF1 is an NF- $\kappa$ B induced protein that enhances NF- $\kappa$ B signaling downstream of TNFRs. Here we  
215 showed that decreasing TRAF1 by inhibition of PKN1 has the potential to break this feed-forward NF- $\kappa$ B  
216 signaling loop in TNFRSF-dependent cancers. Our study identified two compounds, OTSSP167 and XL-  
217 228, that when added to primary patient CLL cells induced dose dependent loss of TRAF1, pS6, pNF- $\kappa$ B  
218 p65, pERK, Mcl-1 and Bcl-2, and concomitant induction of cell death. This was not secondary to cell death,  
219 because we gated on live cells for all measurements except activated caspase 3 which was measured on the  
220 total population of CLL cells. Moreover, in RAJI cells, cell death was observed only when TRAF1 levels  
221 were reduced to minimal levels and RAJI death plateaued at 50%. This suggests RAJI may have  
222 compensatory mechanisms for survival compared to CLL, which show 100% loss of viability at high doses  
223 of the inhibitors. The correlation between decreased TRAF1 protein levels, decreased downstream signals  
224 and increased caspase-3 activation at similar IC<sub>50</sub>, is consistent with a direct effect through the pPKN1-  
225 pTRAF1-NF- $\kappa$ B/MAPK/pS6 signaling axis. In contrast, another inhibitor AT7867, with a higher IC<sub>50</sub> for  
226 inhibiting PKN1 failed to decrease TRAF1 significantly in CLL cells and showed no effect on the  
227 downstream signals or cell death. OTSSP167 is also known as a MELK inhibitor. OTSSP167 has been  
228 tested in phase 1/2 trials for breast cancer and acute myeloid leukemia, and has been suggested as a CLL  
229 treatment based on its ability to induce apoptosis in primary CLL cells.<sup>58</sup> However, many inhibitors, and in  
230 particular OTSSP167, have broad effects on multiple kinases.<sup>59</sup> Thus, it is possible that the effects of  
231 OTSSP167 on PKN1 contributed to CLL cell death in MELK inhibitor studies.<sup>58</sup> The finding that  
232 OTSSP167 and XL-228 show an order of potency for inhibiting TRAF1 and its downstream signals that  
233 matches the order of potency for PKN1 inhibition is also consistent with these drugs acting on PKN1.  
234 OTSSP167, with 11 nM IC<sub>50</sub> for PKN1 inhibition *in vitro* and an IC<sub>50</sub> for decreasing TRAF1 and increasing  
235 apoptosis of CLL cells of 30 nM, represents a good starting point for future drug discovery efforts to identify  
236 a more potent and selective PKN1 inhibitor. Other drugs identified as potential PKN1 inhibitors *in vitro*,  
237 such as the JAK inhibitor tofacitinib,<sup>34</sup> were not effective in lowering TRAF1 (**Figure 3B**), potentially  
238 because their effects on other targets counteracted the potential effect on PKN1, although this was not  
239 further investigated here.

240  
241 There was no correlation between TRAF1 levels pre-treatment or of sensitivity to PKN1 inhibition based  
242 on Rai stage of the CLL patients. Of 19 CLL patient samples examined for effects of OTSSP167, 16 showed  
243 a strong correlation between loss of TRAF1 and gain of caspase 3. Of the 3 outliers, two had very low  
244 TRAF1 levels to start with. One CLL patient sample showed an initial small increase in TRAF1 followed  
245 by loss of TRAF1 at the concentrations where most cells showed activated caspase 3. Although, IgM mutant  
246 status of the donors was not available for these banked CLL samples, the finding that the majority of  
247 samples tested responded to a treatment that lowers TRAF1, and that most CLL cells have high TRAF1  
248 levels, suggests the utility of this approach across CLL patient groups. Of note an enrichment for TRAF1<sup>hi</sup>  
249 cells was also observed at suboptimal venetoclax doses for 4/6 donors tested. This might reflect selective  
250 loss of TRAF1<sup>lo</sup> cells, leading to enrichment of the TRAF1<sup>hi</sup> cells at low inhibitor doses, consistent with an  
251 important role for TRAF1 in CLL cell survival and potentially venetoclax resistance. Thus, addition of a  
252 TRAF1 inhibitor, via PKN1 inhibition, has the potential to target venetoclax resistance.

253

254 While there has been much recent interest and success in targeting antigen receptor signaling and Bcl-2 in  
255 B cell malignancies<sup>5</sup>, to date there has been minimal attention paid to TNFR-mediated survival signaling.  
256 TRAF-binding TNFR family members in the tumor microenvironment can contribute key survival signals  
257 to CLL cells,<sup>2, 60, 61</sup> and there is accumulating evidence for the importance of CD40L in promoting drug  
258 resistance and contributing to tumor cell survival in the lymphoid microenvironment.<sup>62, 63</sup> The value of the  
259 PKN1-TRAF1 signaling axis as a target for CLL lies in its role downstream of many TNFRSF members  
260 and the fact that TNFRSF signaling contributes to NF- $\kappa$ B, MAPK signaling, as well as induction of pS6,  
261 an important determinant of cell size and cancer cell fate.<sup>64, 65</sup> Thus, targeting this pathway could be  
262 complementary to drugs that target Bcl-2 family members and/or BCR signaling. In particular, we showed  
263 that OTSSP167 synergizes with venetoclax in inducing cell death. Although Mcl-1 inhibitors are being  
264 developed to target venetoclax resistance,<sup>66</sup> these inhibitors do not target all Bcl-2 family members.  
265 TNFRSF signaling has also been implicated in inducing other pro-survival Bcl-2 family members, such as  
266 Bcl-x<sub>L</sub> and Bfl-1.<sup>67</sup> In contrast to Bcl-2 family members, which are important in multiple cell types, TRAF1  
267 expression is limited to activated cells of the immune system. Thus, inhibition of PKN1-TRAF1-dependent  
268 TNFRSF signaling to inhibit NF- $\kappa$ B, MAPKs and pS6 might offer improved long-term protection against  
269 relapse.

270

271

272

#### **Author contributions**

273 M.I.E., J.C.L. A.A.A.-S. and T.H.W. designed experiments, analyzed data, and wrote the manuscript. J.  
274 C.L., M.I.E. and A.A.A.-S, with help from K.T., S.Z. and A.M., performed experiments. A.A. helped with  
275 CLL sample coordination and clinical data. D.U., M.I., MP. and R.A. provided medicinal chemistry  
276 expertise and contributed the OICR inhibitor library. M.M. provided samples, clinical data and insight.

277

#### **Acknowledgements**

278

279 We thank Ann McPherson for generating TRAF1- knockdown RAJI cells, Juan Carlos Zúñiga-Pflücker for  
281 providing OP9 stromal cells, Dionne White, Joanna Warzyszyńska, Nathalie Simard and Janine Charron  
282 for assistance with flow cytometry, Birinder Ghuman for technical assistance, and all the patients for  
283 participating and donating samples to make this study possible. This research was funded by a Foundation  
284 grant from the Canadian Institute of Health Research (FDN-143250) and an Innovation grant from the  
285 Canadian Cancer Society Research Institute (2012-701326) to T.H.W.

286

#### **Competing financial interests**

287

288 MIE, AAS and THW have filed intellectual property on PKN1 inhibition.

289

290

291

292

293

294 References

295

296 1. Duhren-von Minden M, Ubelhart R, Schneider D, Wossning T, Bach MP, Buchner M, *et al.* Chronic lymphocytic leukaemia is driven by antigen-independent cell-autonomous  
297 signalling. *Nature* 2012 Sep 13; **489**(7415): 309-312.

299

300 2. Herishanu Y, Perez-Galan P, Liu D, Biancotto A, Pittaluga S, Vire B, *et al.* The lymph  
301 node microenvironment promotes B-cell receptor signaling, NF-kappaB activation, and  
302 tumor proliferation in chronic lymphocytic leukemia. *Blood* 2011 Jan 13; **117**(2): 563-  
303 574.

304

305 3. Routledge DJ, Bloor AJ. Recent advances in therapy of chronic lymphocytic leukaemia.  
306 *Br J Haematol* 2016 Aug; **174**(3): 351-367.

307

308 4. Coutre S, Choi M, Furman RR, Eradat H, Heffner L, Jones JA, *et al.* Venetoclax for  
309 patients with chronic lymphocytic leukemia who progressed during or after idelalisib  
310 therapy. *Blood* 2018 Apr 12; **131**(15): 1704-1711.

311

312 5. Woyach JA, Johnson AJ. Targeted therapies in CLL: mechanisms of resistance and  
313 strategies for management. *Blood* 2015 Jul 23; **126**(4): 471-477.

314

315 6. Burger JA, Tedeschi A, Barr PM, Robak T, Owen C, Ghia P, *et al.* Ibrutinib as Initial  
316 Therapy for Patients with Chronic Lymphocytic Leukemia. *N Engl J Med* 2015 Dec 17;  
317 **373**(25): 2425-2437.

318

319 7. Roberts AW, Davids MS, Pagel JM, Kahl BS, Puvvada SD, Gerecitano JF, *et al.*  
320 Targeting BCL2 with Venetoclax in Relapsed Chronic Lymphocytic Leukemia. *N Engl J*  
321 *Med* 2016 Jan 28; **374**(4): 311-322.

322

323 8. Frey NV, Porter DL. CAR T-cells merge into the fast lane of cancer care. *Am J Hematol*  
324 2016 Jan; **91**(1): 146-150.

325

326 9. Jain N, O'Brien S. Targeted therapies for CLL: Practical issues with the changing  
327 treatment paradigm. *Blood Rev* 2016 May; **30**(3): 233-244.

328

329 10. Jain N, O'Brien S. BCR inhibitor failure in CLL: an unmet need. *Blood* 2016 Nov 3;  
330 **128**(18): 2193-2194.

331

332 11. Kitada S, Zapata JM, Andreeff M, Reed JC. Bryostatins and CD40-ligand enhance  
333 apoptosis resistance and induce expression of cell survival genes in B-cell chronic  
334 lymphocytic leukaemia. *Br J Haematol* 1999 Sep; **106**(4): 995-1004.

335

336 12. Baxendale AJ, Dawson CW, Stewart SE, Mudaliar V, Reynolds G, Gordon J, *et al.*  
337 Constitutive activation of the CD40 pathway promotes cell transformation and neoplastic  
338 growth. *Oncogene* 2005 Nov 24; **24**(53): 7913-7923.

- 339  
340 13. Horie R, Watanabe T, Morishita Y, Ito K, Ishida T, Kanegae Y, *et al.* Ligand-  
341 independent signaling by overexpressed CD30 drives NF-kappaB activation in Hodgkin-  
342 Reed-Sternberg cells. *Oncogene* 2002 Apr 11; **21**(16): 2493-2503.  
343  
344 14. Eliopoulos AG, Waites ER, Blake SM, Davies C, Murray P, Young LS. TRAF1 is a  
345 critical regulator of JNK signaling by the TRAF-binding domain of the Epstein-Barr  
346 virus-encoded latent infection membrane protein 1 but not CD40. *J Virol* 2003 Jan;  
347 **77**(2): 1316-1328.  
348  
349 15. Xie P. TRAF molecules in cell signaling and in human diseases. *J Mol Signal* 2013; **8**(1):  
350 7.  
351  
352 16. Wang CY, Mayo MW, Korneluk RG, Goeddel DV, Baldwin AS, Jr. NF-kappaB  
353 antiapoptosis: induction of TRAF1 and TRAF2 and c-IAP1 and c-IAP2 to suppress  
354 caspase-8 activation. *Science* 1998; **281**: 1680-1683.  
355  
356 17. Zheng C, Kabaleeswaran V, Wang Y, Cheng G, Wu H. Crystal structures of the TRAF2:  
357 cIAP2 and the TRAF1: TRAF2: cIAP2 complexes: affinity, specificity, and regulation.  
358 *Mol Cell* 2010 Apr 9; **38**(1): 101-113.  
359  
360 18. Elgueta R, Benson MJ, de Vries VC, Wasiuk A, Guo Y, Noelle RJ. Molecular  
361 mechanism and function of CD40/CD40L engagement in the immune system. *Immunol*  
362 *Rev* 2009 May; **229**(1): 152-172.  
363  
364 19. Bertrand MJ, Milutinovic S, Dickson KM, Ho WC, Boudreault A, Durkin J, *et al.* cIAP1  
365 and cIAP2 facilitate cancer cell survival by functioning as E3 ligases that promote RIP1  
366 ubiquitination. *Mol Cell* 2008 Jun 20; **30**(6): 689-700.  
367  
368 20. Li X, Yang Y, Ashwell JD. TNF-RII and c-IAP1 mediate ubiquitination and degradation  
369 of TRAF2. *Nature* 2002 Mar 21; **416**(6878): 345-347.  
370  
371 21. Zapata JM, Krajewska M, Krajewski S, Kitada S, Welsh K, Monks A, *et al.* TNFR-  
372 associated factor family protein expression in normal tissues and lymphoid malignancies.  
373 *J Immunol* 2000 Nov 1; **165**(9): 5084-5096.  
374  
375 22. Cerhan JR, Ansell SM, Fredericksen ZS, Kay NE, Liebow M, Call TG, *et al.* Genetic  
376 variation in 1253 immune and inflammation genes and risk of non-Hodgkin lymphoma.  
377 *Blood* 2007 Dec 15; **110**(13): 4455-4463.  
378  
379 23. Yeh WC, Shahinian A, Speiser D, Kraunus J, Billia F, Wakeham A, *et al.* Early lethality,  
380 functional NF-kB activation, and increased sensitivity to TNF-induced cell death in  
381 TRAF2-deficient mice. *Immunity* 1997; **7**: 715-725.  
382  
383 24. Zapata JM, Reed JC. TRAF1: lord without a RING. *Sci STKE* 2002 May 21; **2002**(133):  
384 PE27.

- 385  
386 25. Tsitsikov EN, Laouini D, Dunn IF, Sannikova TY, Davidson L, Alt FW, *et al.* TRAF1 is  
387 a negative regulator of TNF signaling: Enhanced TNF signaling in TRAF1-deficient  
388 mice. *Immunity* 2001; **15**(4): 647-657.  
389
- 390 26. Zhang B, Wang Z, Li T, Tsitsikov EN, Ding HF. NF-kappaB2 mutation targets TRAF1  
391 to induce lymphomagenesis. *Blood* 2007 Jul 15; **110**(2): 743-751.  
392
- 393 27. Kato T, Jr., Gotoh Y, Hoffmann A, Ono Y. Negative regulation of constitutive NF-  
394 kappaB and JNK signaling by PKN1-mediated phosphorylation of TRAF1. *Genes Cells*  
395 2008 May; **13**(5): 509-520.  
396
- 397 28. Grinshtein N, Datti A, Fujitani M, Uehling D, Prakesch M, Isaac M, *et al.* Small  
398 molecule kinase inhibitor screen identifies polo-like kinase 1 as a target for  
399 neuroblastoma tumor-initiating cells. *Cancer Res* 2011 Feb 15; **71**(4): 1385-1395.  
400
- 401 29. Trzcinska-Daneluti AM, Nguyen L, Jiang C, Fladd C, Uehling D, Prakesch M, *et al.* Use  
402 of kinase inhibitors to correct DeltaF508-CFTR function. *Mol Cell Proteomics* 2012 Sep;  
403 **11**(9): 745-757.  
404
- 405 30. Choi H-S, Wang Z, Richmond W, He X, Yang K, JIang T, *et al.* Design and synthesis of  
406 7H-pyrrolo[2,3-d]pyrimidines as focal adhesion kinase inhibitors. Part 1. *Bioorganic and*  
407 *Medicinal Chemistry Letters* 2006; **16**(8): 2173-2176.  
408
- 409 31. Rothe M, Sarma V, Dixit VM, Goeddel DV. TRAF2-mediated activation of NF-kappa B  
410 by TNF receptor 2 and CD40. *Science* 1995; **269**: 1424-1427.  
411
- 412 32. Metzger E, Yin N, Wissmann M, Kunowska N, Fischer K, Friedrichs N, *et al.*  
413 Phosphorylation of histone H3 at threonine 11 establishes a novel chromatin mark for  
414 transcriptional regulation. *Nat Cell Biol* 2008 Jan; **10**(1): 53-60.  
415
- 416 33. Darding M, Feltham R, Tenev T, Bianchi K, Benetatos C, Silke J, *et al.* Molecular  
417 determinants of Smac mimetic induced degradation of cIAP1 and cIAP2. *Cell Death*  
418 *Differ* 2011 Aug; **18**(8): 1376-1386.  
419
- 420 34. Ostrovskiy D, Rumpf T, Eib J, Lumbroso A, Slynko I, Klaeger S, *et al.* Tofacitinib and  
421 analogs as inhibitors of the histone kinase PRK1 (PKN1). *Future Med Chem* 2016 Sep;  
422 **8**(13): 1537-1551.  
423
- 424 35. Dong LQ, Landa LR, Wick MJ, Zhu L, Mukai H, Ono Y, *et al.* Phosphorylation of  
425 protein kinase N by phosphoinositide-dependent protein kinase-1 mediates insulin signals  
426 to the actin cytoskeleton. *Proc Natl Acad Sci U S A* 2000 May 9; **97**(10): 5089-5094.  
427
- 428 36. Flynn P, Mellor H, Casamassima A, Parker PJ. Rho GTPase control of protein kinase C-  
429 related protein kinase activation by 3-phosphoinositide-dependent protein kinase. *J Biol*  
430 *Chem* 2000 Apr 14; **275**(15): 11064-11070.

- 431  
432 37. Speiser DE, Lee SY, Wong B, Arron J, Santana A, Kong YY, *et al.* A regulatory role for  
433 TRAF1 in antigen-induced apoptosis of T cells. *J Exp Med* 1997; **185**(10): 1777-1783.  
434
- 435 38. Sabbagh L, Pulle G, Liu Y, Tsitsikov EN, Watts TH. ERK-Dependent Bim Modulation  
436 Downstream of the 4-1BB-TRAF1 Signaling Axis Is a Critical Mediator of CD8 T Cell  
437 Survival In Vivo. *J Immunol* 2008 Jun 15; **180**(12): 8093-8101.  
438
- 439 39. Edilova MI, Abdul-Sater AA, Watts TH. TRAF1 Signaling in Human Health and  
440 Disease. *Front Immunol* 2018; **9**: 2969.  
441
- 442 40. Croft M. The role of TNF superfamily members in T-cell function and diseases. *Nat Rev*  
443 *Immunol* 2009 Apr; **9**(4): 271-285.  
444
- 445 41. Arron JR, Pewzner-Jung Y, Walsh MC, Kobayashi T, Choi Y. Regulation of the  
446 subcellular localization of tumor necrosis factor receptor-associated factor (TRAF)2 by  
447 TRAF1 reveals mechanisms of TRAF2 signaling. *J Exp Med* 2002 Oct 7; **196**(7): 923-  
448 934.  
449
- 450 42. Greenfeld H, Takasaki K, Walsh MJ, Ersing I, Bernhardt K, Ma Y, *et al.* TRAF1  
451 Coordinates Polyubiquitin Signaling to Enhance Epstein-Barr Virus LMP1-Mediated  
452 Growth and Survival Pathway Activation. *PLoS Pathog* 2015 May; **11**(5): e1004890.  
453
- 454 43. Guo F, Sun A, Wang W, He J, Hou J, Zhou P, *et al.* TRAF1 is involved in the classical  
455 NF-kappaB activation and CD30-induced alternative activity in Hodgkin's lymphoma  
456 cells. *Mol Immunol* 2009 Jun 18.  
457
- 458 44. McPherson AJ, Snell LM, Mak TW, Watts TH. Opposing roles for TRAF1 in the  
459 alternative versus classical NF-kappaB pathway in T cells. *The Journal of biological*  
460 *chemistry* 2012 June 29, 2012; **287**(27): 23010-23019.  
461
- 462 45. Xie P, Hostager BS, Munroe ME, Moore CR, Bishop GA. Cooperation between TNF  
463 receptor-associated factors 1 and 2 in CD40 signaling. *J Immunol* 2006 May 1; **176**(9):  
464 5388-5400.  
465
- 466 46. Wang C, Edilova MI, Wagar LE, Mujib S, Singer M, Bernard NF, *et al.* Effect of IL-7  
467 Therapy on Phospho-Ribosomal Protein S6 and TRAF1 Expression in HIV-Specific CD8  
468 T Cells in Patients Receiving Antiretroviral Therapy. *J Immunol* 2018 Jan 15; **200**(2):  
469 558-564.  
470
- 471 47. Stilgenbauer S, Eichhorst B, Schetelig J, Coutre S, Seymour JF, Munir T, *et al.*  
472 Venetoclax in relapsed or refractory chronic lymphocytic leukaemia with 17p deletion: a  
473 multicentre, open-label, phase 2 study. *Lancet Oncol* 2016 Jun; **17**(6): 768-778.  
474
- 475 48. Bose P, Gandhi V, Konopleva M. Pathways and mechanisms of venetoclax resistance.  
476 *Leuk Lymphoma* 2017 Sep; **58**(9): 1-17.



- 477  
478 49. Tahir SK, Smith ML, Hessler P, Rapp LR, Idler KB, Park CH, *et al.* Potential  
479 mechanisms of resistance to venetoclax and strategies to circumvent it. *BMC Cancer*  
480 2017 Jun 2; **17**(1): 399.  
481  
482 50. Amano M, Mukai H, Ono Y, Chihara K, Matsui T, Hamajima Y, *et al.* Identification of a  
483 putative target for Rho as the serine-threonine kinase protein kinase N. *Science* 1996 Feb  
484 2; **271**(5249): 648-650.  
485  
486 51. Watanabe G, Saito Y, Madaule P, Ishizaki T, Fujisawa K, Morii N, *et al.* Protein kinase  
487 N (PKN) and PKN-related protein rhophilin as targets of small GTPase Rho. *Science*  
488 1996 Feb 2; **271**(5249): 645-648.  
489  
490 52. Jilg CA, Ketscher A, Metzger E, Hummel B, Willmann D, Russeler V, *et al.*  
491 PRK1/PKN1 controls migration and metastasis of androgen-independent prostate cancer  
492 cells. *Oncotarget* 2014 Dec 30; **5**(24): 12646-12664.  
493  
494 53. Mashud R, Nomachi A, Hayakawa A, Kubouchi K, Danno S, Hirata T, *et al.* Impaired  
495 lymphocyte trafficking in mice deficient in the kinase activity of PKN1. *Sci Rep* 2017  
496 Aug 9; **7**(1): 7663.  
497  
498 54. Yuan Q, Ren C, Xu W, Petri B, Zhang J, Zhang Y, *et al.* PKN1 Directs Polarized RAB21  
499 Vesicle Trafficking via RPH3A and Is Important for Neutrophil Adhesion and Ischemia-  
500 Reperfusion Injury. *Cell Rep* 2017 Jun 20; **19**(12): 2586-2597.  
501  
502 55. Zeng R, Wang Z, Li X, Chen Y, Yang S, Dong J. Cyclin-dependent kinase 1-mediated  
503 phosphorylation of protein kinase N1 promotes anchorage-independent growth and  
504 migration. *Cell Signal* 2020 Jan 22; **69**: 109546.  
505  
506 56. Baracho GV, Cato MH, Zhu Z, Jaren OR, Hobeika E, Reth M, *et al.* PDK1 regulates B  
507 cell differentiation and homeostasis. *Proc Natl Acad Sci U S A* 2014 Jul 1; **111**(26):  
508 9573-9578.  
509  
510 57. Galgano MT, Conaway M, Spencer AM, Paschal BM, Frierson HF, Jr. PRK1 distribution  
511 in normal tissues and carcinomas: overexpression and activation in ovarian serous  
512 carcinoma. *Human pathology* 2009 Oct; **40**(10): 1434-1440.  
513  
514 58. Zhang Y, Zhou X, Li Y, Xu Y, Lu K, Li P, *et al.* Inhibition of maternal embryonic  
515 leucine zipper kinase with OTSSP167 displays potent anti-leukemic effects in chronic  
516 lymphocytic leukemia. *Oncogene* 2018 Oct; **37**(41): 5520-5533.  
517  
518 59. Klaeger S, Heinzlmeir S, Wilhelm M, Polzer H, Vick B, Koenig PA, *et al.* The target  
519 landscape of clinical kinase drugs. *Science* 2017 Dec 1; **358**(6367).  
520

- 521 60. Cols M, Barra CM, He B, Puga I, Xu W, Chiu A, *et al.* Stromal endothelial cells establish  
522 a bidirectional crosstalk with chronic lymphocytic leukemia cells through the TNF-  
523 related factors BAFF, APRIL, and CD40L. *J Immunol* 2012 Jun 15; **188**(12): 6071-6083.  
524
- 525 61. Jayappa KD, Portell CA, Gordon VL, Capaldo BJ, Bekiranov S, Axelrod MJ, *et al.*  
526 Microenvironmental agonists generate de novo phenotypic resistance to combined  
527 ibrutinib plus venetoclax in CLL and MCL. *Blood Adv* 2017 Jun 13; **1**(14): 933-946.  
528
- 529 62. Oppermann S, Ylanko J, Shi Y, Hariharan S, Oakes CC, Brauer PM, *et al.* High-content  
530 screening identifies kinase inhibitors that overcome venetoclax resistance in activated  
531 CLL cells. *Blood* 2016 Aug 18; **128**(7): 934-947.  
532
- 533 63. Crassini K, Shen Y, Mulligan S, Giles Best O. Modeling the chronic lymphocytic  
534 leukemia microenvironment in vitro. *Leuk Lymphoma* 2017 Feb; **58**(2): 266-279.  
535
- 536 64. Ruvinsky I, Meyuhas O. Ribosomal protein S6 phosphorylation: from protein synthesis  
537 to cell size. *Trends Biochem Sci* 2006 Jun; **31**(6): 342-348.  
538
- 539 65. Sulima SO, Hofman IJF, De Keersmaecker K, Dinman JD. How Ribosomes Translate  
540 Cancer. *Cancer Discov* 2017 Oct; **7**(10): 1069-1087.  
541
- 542 66. Besbes S, Pocard M, Mirshahi M, Billard C. The first MCL-1-selective BH3 mimetics  
543 have therapeutic potential for chronic lymphocytic leukemia. *Crit Rev Oncol Hematol*  
544 2016 Apr; **100**: 32-36.  
545
- 546 67. Lee HW, Park SJ, Choi BK, Kim HH, Nam KO, Kwon BS. 4-1BB Promotes the Survival  
547 of CD8(+) T Lymphocytes by Increasing Expression of Bcl-x(L) and Bfl-1. *J Immunol*  
548 2002; **169**(9): 4882-4888.  
549  
550

551 **Figure Legends**

552

553 **Figure 1. PKN1 kinase activity and TRAF1 S146 are required for TRAF1 protein stability.** (A) RAJI  
554 or Daudi cells were stably transduced with lentiviruses expressing control shRNA (shCTL), with shRNA  
555 targeting TRAF1 (shTRAF1) or with shRNA targeting PKN1 (shPKN1) and whole cell lysates were  
556 subjected to western blot analysis for TRAF1, PKN1 or GAPDH. (B) shCTL or shPKN1 RAJI cells were  
557 treated with cycloheximide for the indicated times in hours (h), then whole cell lysates were subjected to  
558 western blot to determine TRAF1, PKN1 or GAPDH levels as indicated on the figures (C,D). 293T cells  
559 stably transduced with shCTL (C) or shPKN1 (D) lentiviruses were transiently transfected with WT TRAF1  
560 or with TRAF1 S146A expression plasmids. Cells were treated or not with cycloheximide (CHX) for the  
561 indicated times, then whole cell lysates were subjected to Western blot analysis of TRAF1, PKN1 or  
562 GAPDH levels. (E) shPKN1 293T cells were transiently co-transfected with TRAF1 as well as shPKN1-  
563 resistant WT or K644E (kinase dead) PKN1. Cells were then treated with cycloheximide (CHX) and then  
564 cell lysates were subjected to Western blot to analyze TRAF1, PKN1 or GAPDH levels. All experiments  
565 were repeated at least two times. Densitometry results are indicated to the right of each gel.

566

567 **Figure 2. PKN1 is required to protect TRAF1 from cIAP-mediated degradation during CD40**  
568 **signaling in RAJI cells, thereby contributing to TRAF1 dependent signaling.** (A) shCTL or shPKN1  
569 RAJI cells were treated with cycloheximide (CHX) for the indicated times, with or without SMAC mimetic  
570 BV6 treatment, then the CD40 signaling complex was immunoprecipitated from whole cell lysates (IP1).  
571 TRAF1 was then immunoprecipitated from the supernatants of the CD40 immunoprecipitates (IP2). IP1,  
572 IP2 or whole cell lysates were analyzed for levels of TRAF1 by Western blotting. (B) shCTL, shTRAF1 or  
573 shPKN1 RAJI cells were serum starved for 24h to reduce constitutive signaling then serum was added back  
574 for the indicated times and whole cell lysates were analyzed by Western blotting for levels of p-ERK1/2,  
575 p-S6 or  $\beta$ -actin as indicated in the figure. Each panel has been repeated at least 3 times. Densitometry results  
576 indicated below the figure and are reported as the average of two similar experiments.

577

578 **Figure 3. Identification of PKN1 inhibitors that decrease TRAF1 protein levels and constitutive**  
579 **signaling in RAJI cell lines.** (A) Base line expression of TRAF1 in shCTL, shTRAF1 and shPKN1 RAJI  
580 cell lines, representative of 7 independent experiments. (B) shCTL RAJI cells were treated with the  
581 indicated inhibitor at doses ranging from 0.1nM-10 $\mu$ M for 24h. TRAF1 expression was measured by  
582 intracellular flow cytometry after treatment. dMFI refers to the MFI for the TRAF1 stain minus the FMO  
583 (background) control. To calculate the IC<sub>50</sub> for PF-941222, AT7867, ipatasertib and uprosertib where  
584 TRAF1 expression was not maximally reduced, TRAF1 was assumed to reach 0 dMFI. N.D. = not  
585 determined. (C). Effect of OTSST167 on TRAF1 levels and death of RAJI cells measured by activated  
586 caspase 3. (D) Baseline expression of TRAF1 and phosphorylation of signaling intermediates pS6, pNF-  
587  $\kappa$ Bp65 and pERK in shCTL, shPKN1 and shTRAF1 RAJI cell lines (top). shCTL RAJI cells were treated  
588 with OTSSP167 or XL-228 at the indicated concentration for 24h. TRAF1, pS6, pNF- $\kappa$ Bp65 and pERK  
589 were measured by flow cytometry (middle, bottom). Data are representative of 2 independent experiments.

590

591 **Figure 4. OTSSP167 and XL-228 decrease TRAF1 protein levels and increase cell death in primary**  
592 **CLL cells.** (A) Representative gating strategy to identify CLL cells. TRAF1 and cleaved caspase-3  
593 expression were measured in CLL cells by flow cytometry after treatment with DMSO control or (B)  
594 OTSSP167 or (C) XL-228 for 24h at the indicated concentrations. In panels (B) and (C), line graphs (top)  
595 show TRAF1 dMFI and %cleaved caspase-3<sup>+</sup> cells as mean  $\pm$  SD. Histograms from one representative  
596 donor depict TRAF1 MFI (bottom left) and cleaved caspase-3 MFI (bottom right) in CLL cells after  
597 treatment with DMSO or inhibitors. TRAF1 MFI was determined by gating on Live CD5<sup>+</sup>CD19<sup>+</sup>  
598 CLL cell. Frequency of cleaved caspase-3<sup>+</sup> cells was determined by gating on CD5<sup>+</sup>CD19<sup>+</sup>  
599 single cells. (D, E)

600 (B, D) n=6 CLL patient samples, 2 experiments pooled. Representative of a total of 16 donors across 8  
601 total experiments. (C, E) n=6 CLL patient samples, 2 experiments pooled. Representative of a total of 9  
602 donors across 4 total experiments.

603  
604 **Figure 5. OTSSP167 and XL-228 decrease the level of Bcl-2 and Mcl-1 protein expression in primary**  
605 **CLL cells.** Bcl-2 and Mcl-1 expression were measured in live CLL cells after treatment with DMSO control  
606 or (A) OTSSP167 or (B) XL-228 for 24h at the indicated concentrations. In each panel, line graphs (left)  
607 show mean dMFI  $\pm$  SD, n=6 CLL patient samples (2 independent experiments pooled), and histograms  
608 (right) from a representative donor depict the MFI of Bcl-2 or Mcl-1 in CLL cells after treatment with  
609 DMSO or the indicated concentration of inhibitor. The same 6 CLL samples are shown here as in figure 4.  
610

611 **Figure 6. OTSSP167 and XL-228 decrease the level of signaling intermediates in primary CLL cells.**  
612 Phosphorylated signaling intermediates pS6, pNF- $\kappa$ Bp65 and pERK were measured in live CLL cells after  
613 treatment with DMSO control or (A) OTSSP167 or (B) XL-228 for 24h at the indicated concentrations. In  
614 each panel, line graphs (left) show mean dMFI  $\pm$  SD, n=6 CLL patient samples (2 independent experiments  
615 pooled), and histograms (right) from a representative donor depict the MFI of pS6, pNF- $\kappa$ Bp65 or pERK  
616 in CLL cells after treatment with DMSO or the indicated concentration of inhibitor. The same 6 CLL  
617 samples were used here as in figures 4 and 5.  
618

619 **Figure 7. Increased cell death following combined treatment with OTSSP167 and venetoclax.** Primary  
620 CLL cells were cultured on OP9 stromal cells and cleaved caspase-3 expression was measured by flow  
621 cytometry following 24h of treatment with: (A) DMSO, 10 nM OTSSP167 or 1 nM venetoclax, (B) 0.1  
622 nM-100 nM VEN  $\pm$  10 nM OTSSP167 or (C) 1 nM-2.5  $\mu$ M OTSSP167  $\pm$  1 nM VEN. (D) Representative  
623 plots from one donor showing gating for live CLL cells and TRAF1 expression by live CLL cells. (E) Live  
624 CLL cells were gated on TRAF1<sup>lo</sup> and TRAF1<sup>hi</sup> cells for analysis of Bcl-2 and Mcl-1 expression. (F) TRAF1  
625 expression on live CLL cells after treatment with the indicated dose of venetoclax (left) or OTSSP167 (right).  
626 Graphs show %cleaved caspase-3<sup>+</sup> cells as mean $\pm$ SD, n=6 (2 independent experiments pooled). 1 CLL  
627 sample was from figure 4-6, 5 were new samples. Statistical analysis was performed using a non-parametric  
628 Dunn's multiple comparisons test. \*p<0.05; ns, not significant. (G) Schematic showing BCR and TNFR  
629 signaling pathways in CLL, with sites of action of PKN1 inhibition and venetoclax indicated.

630

Figure 1

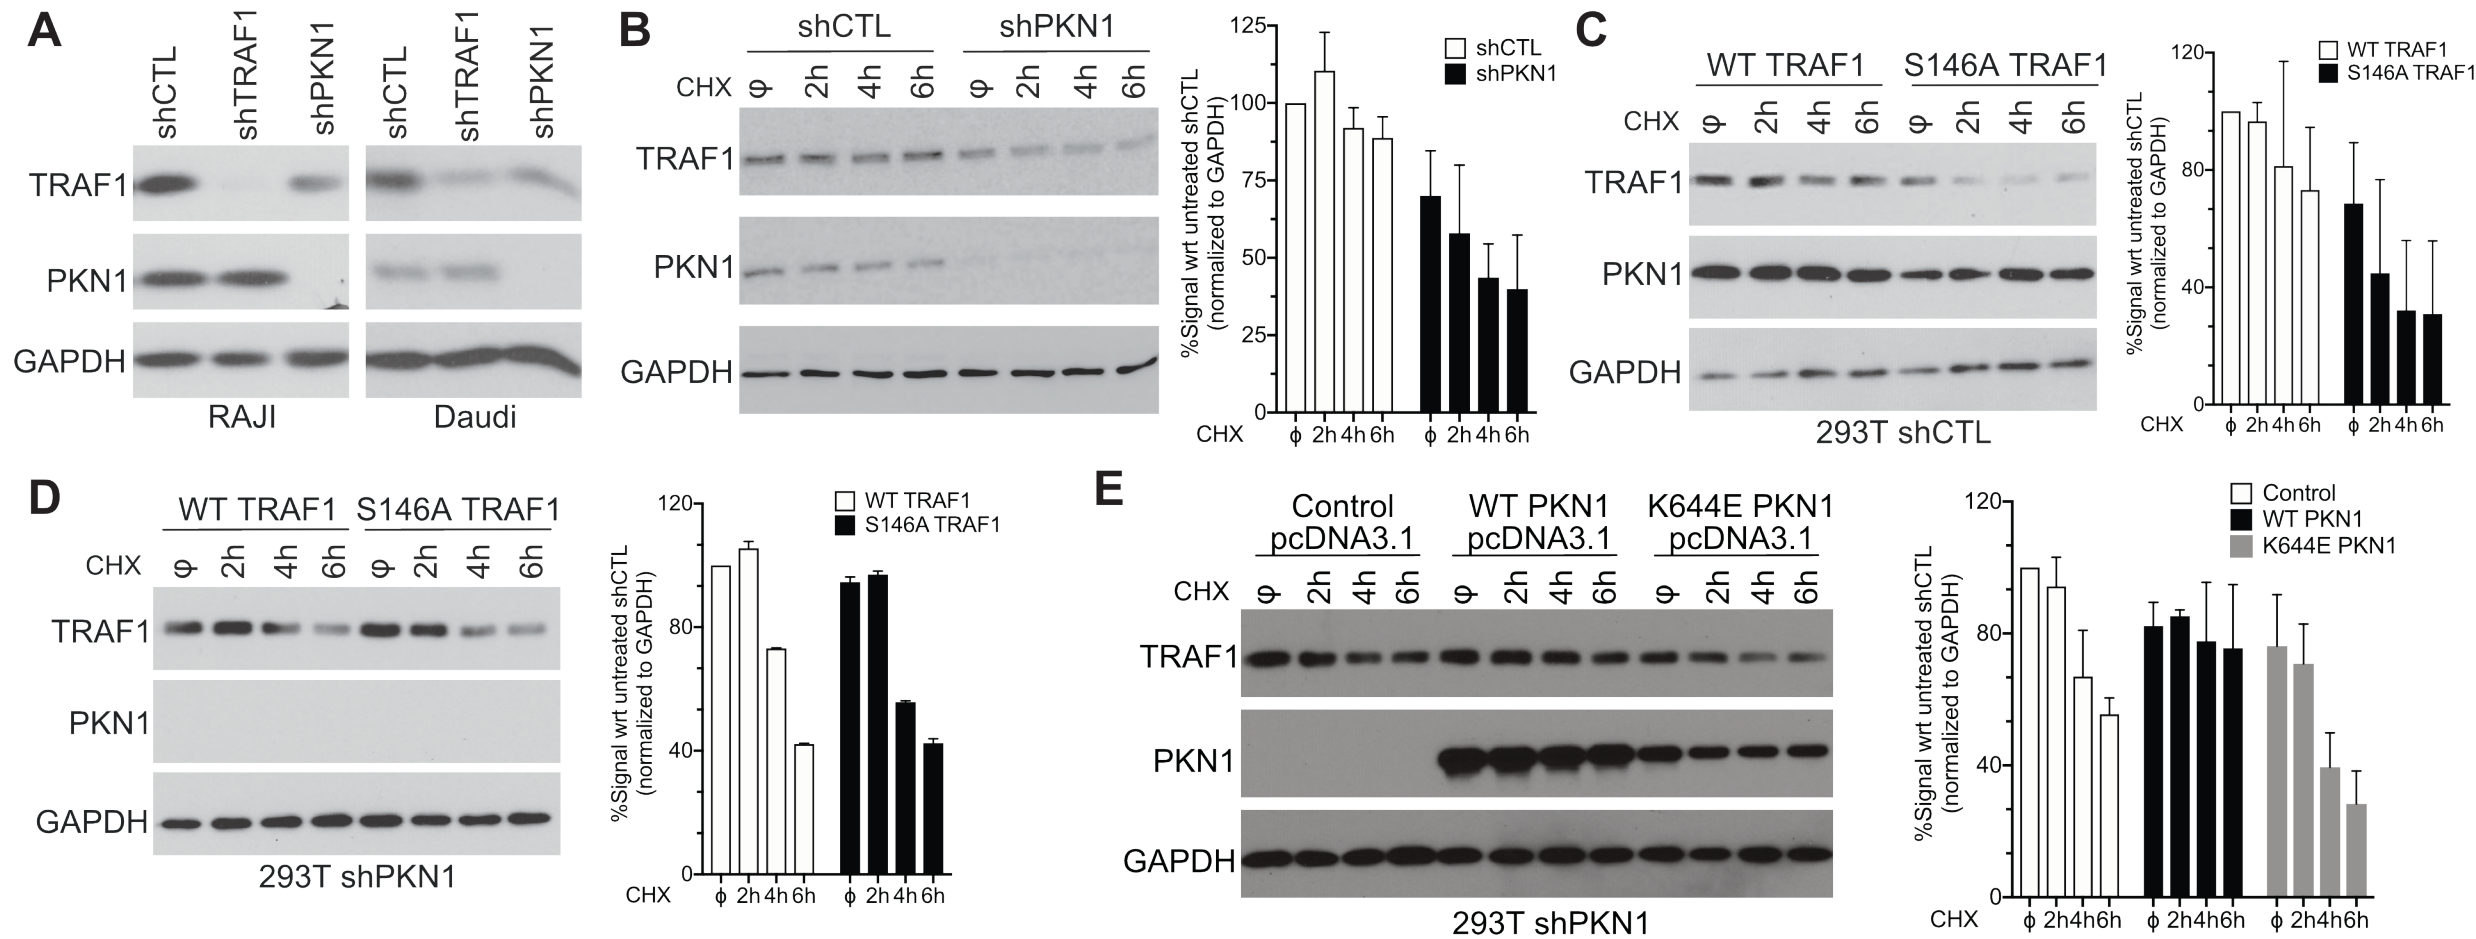

Figure 2

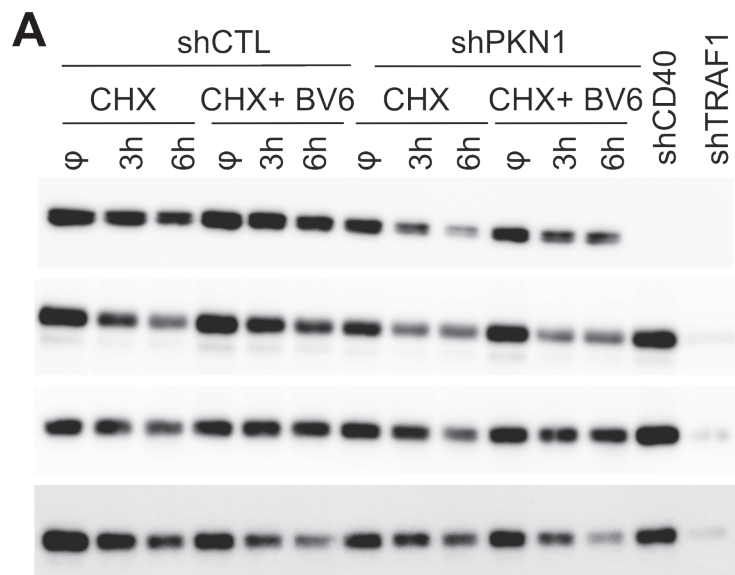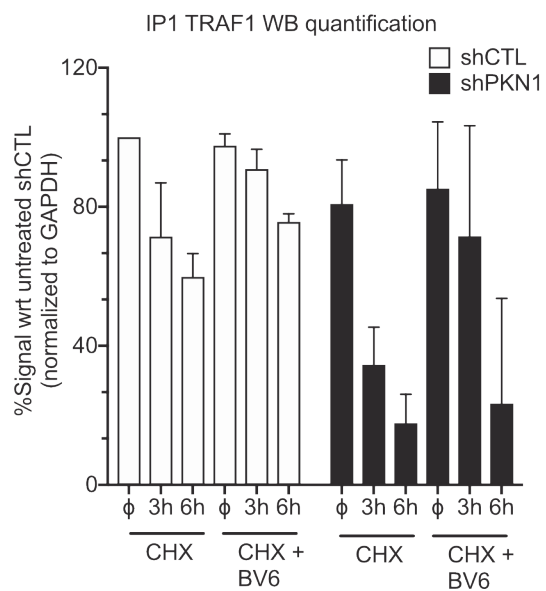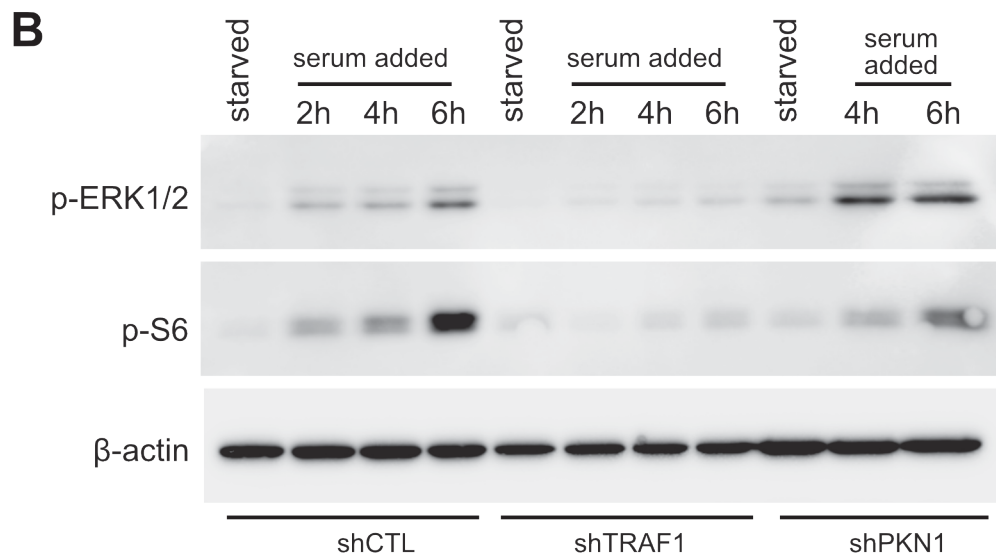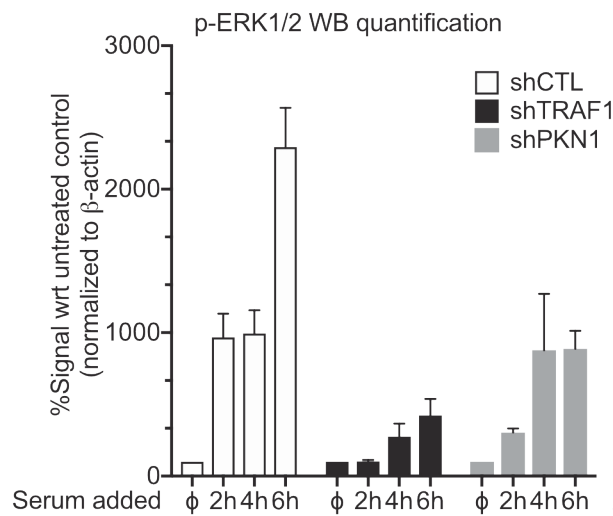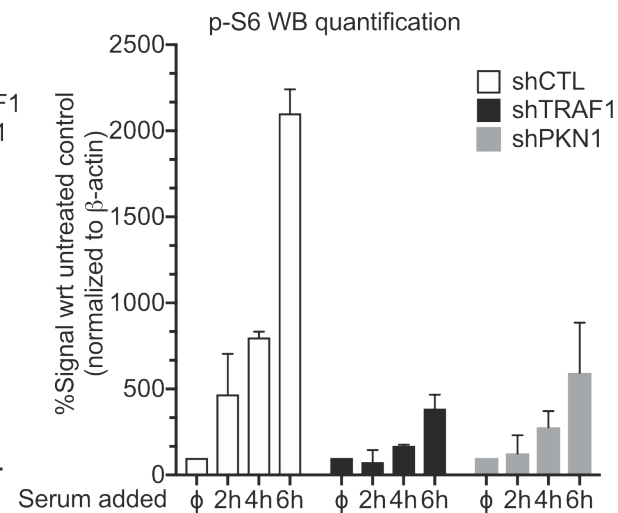

### Figure 3

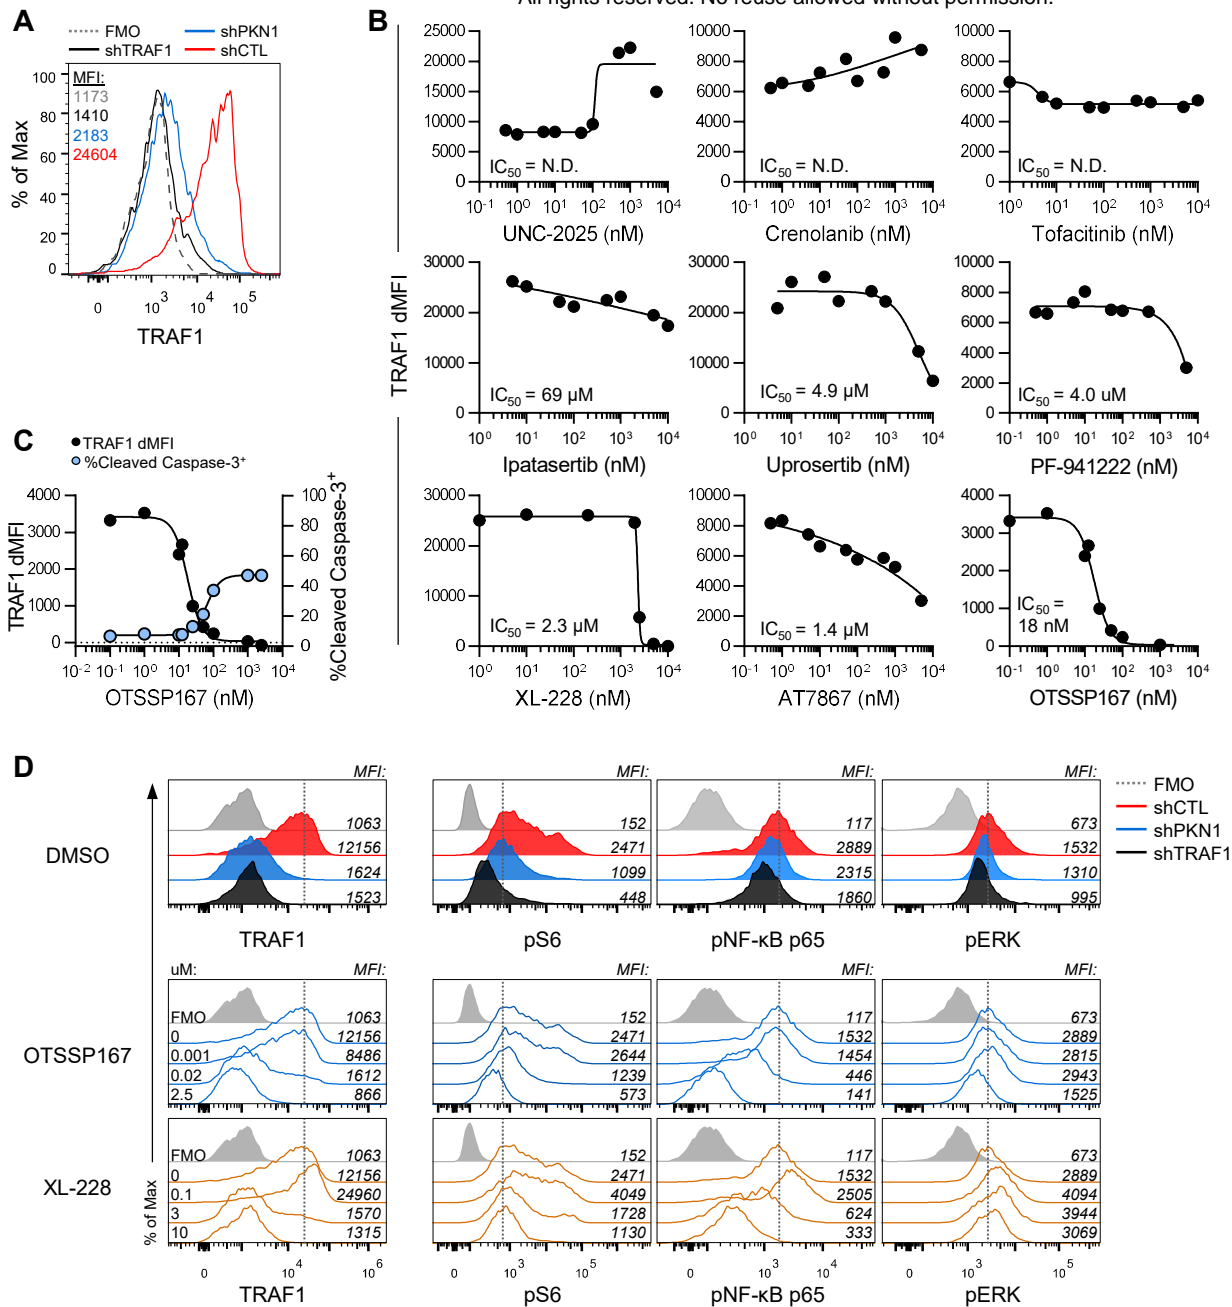

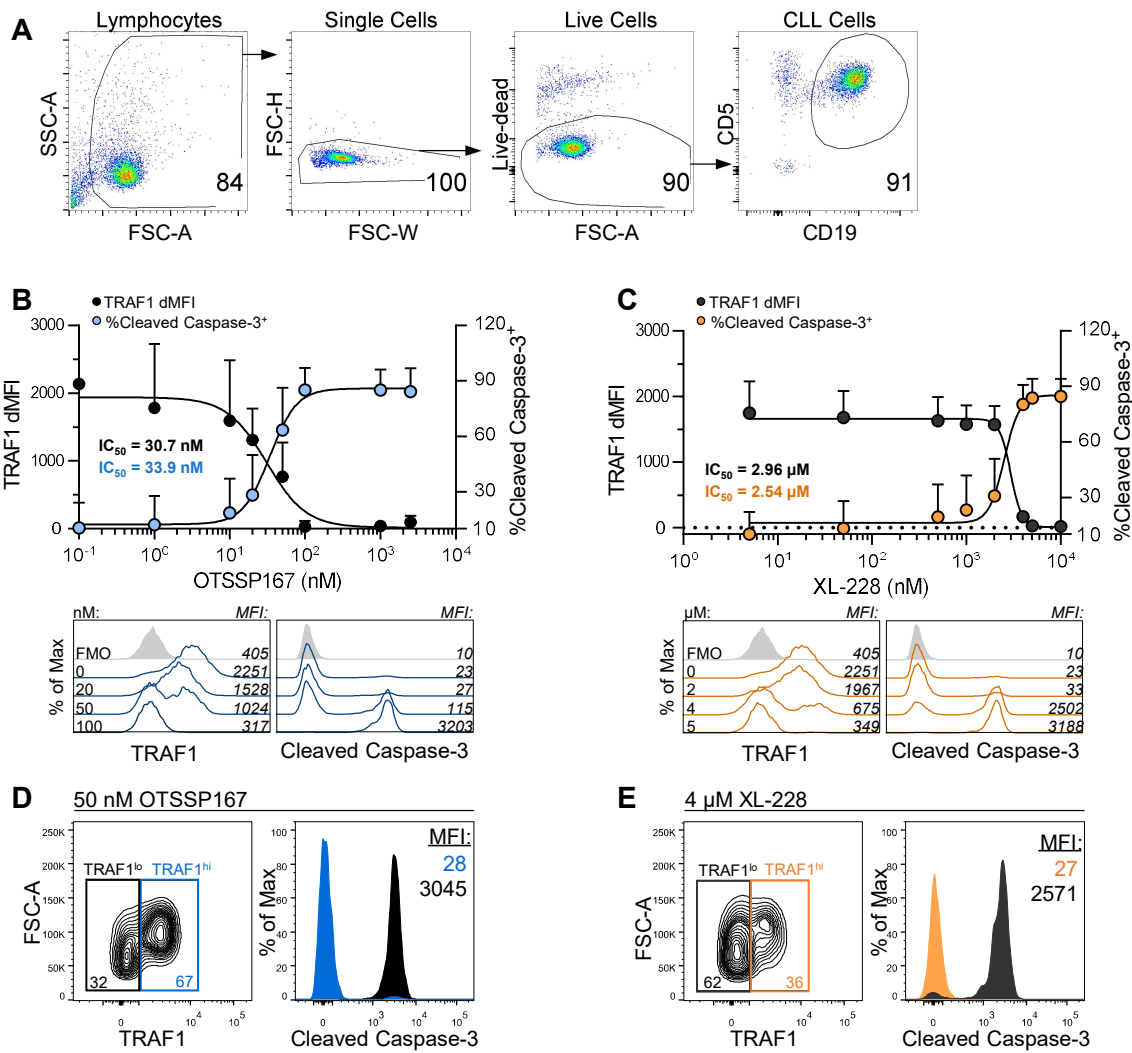



# Figure 5

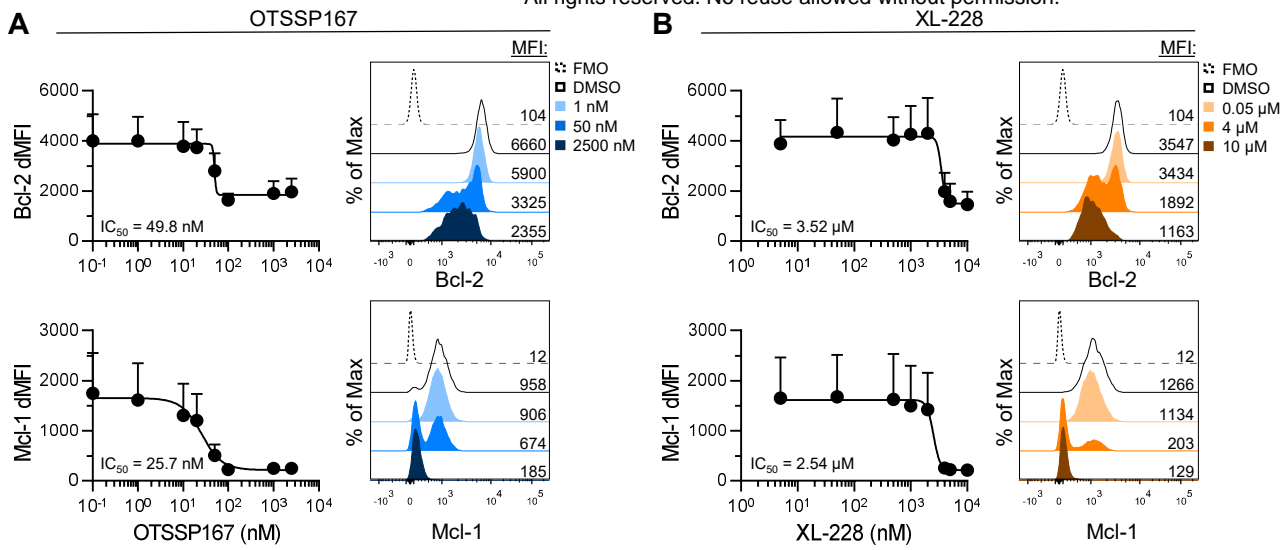

Figure 6

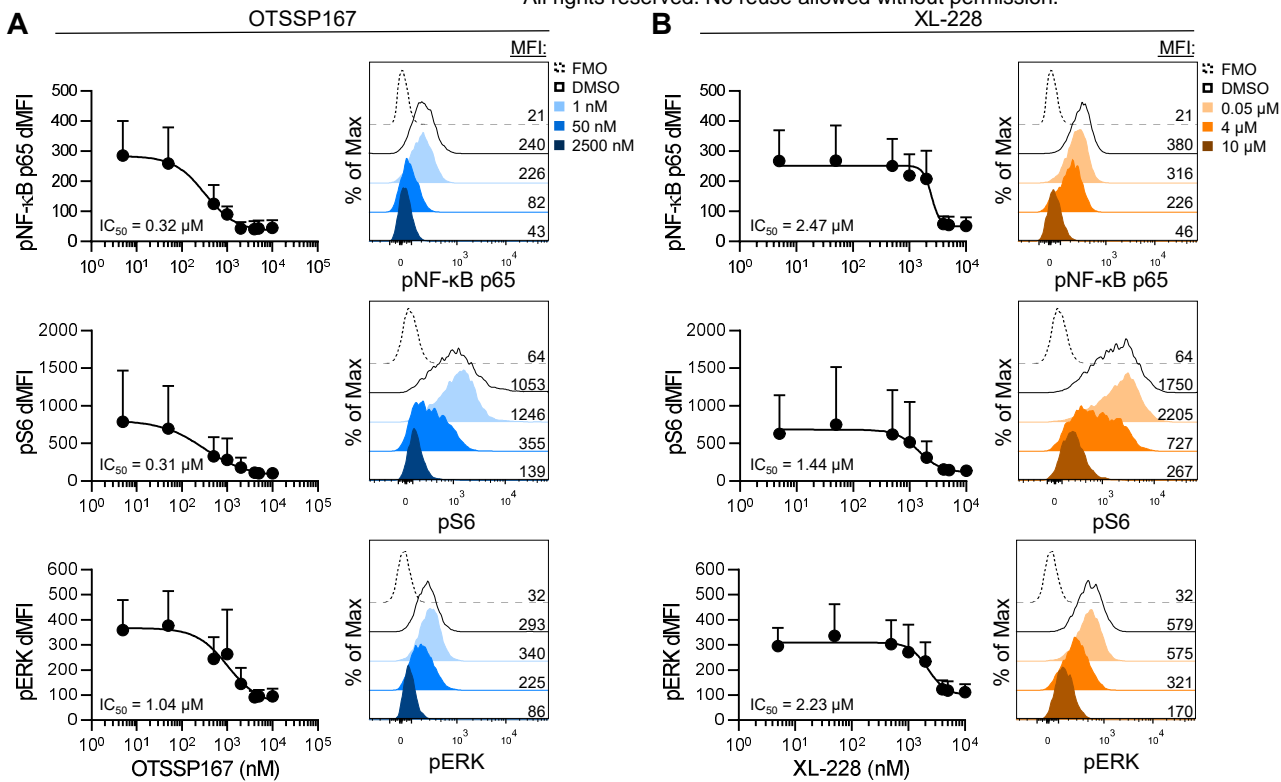

## Figure 7

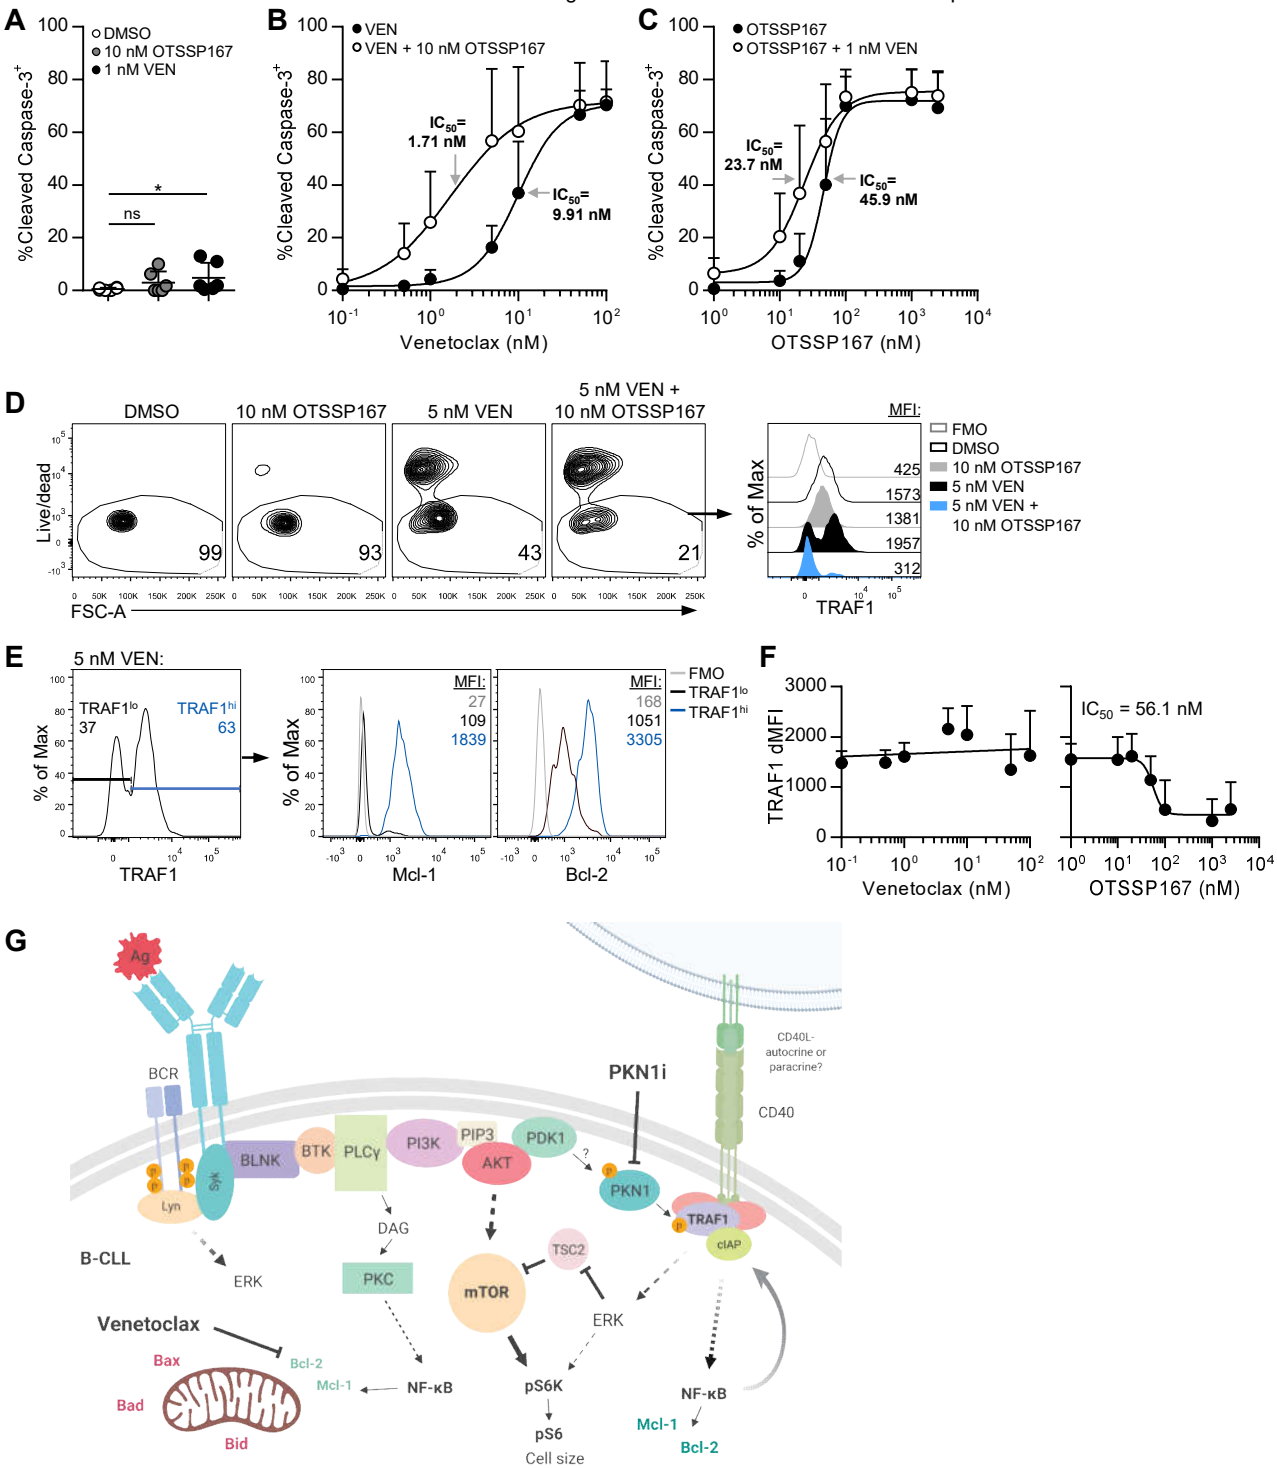

Source: https://medrxiv.org/content/10.1101/2021.03.22.21253655v1.full.pdf
